# Supplementary material for: The rodent aging interventions database (RAID): a data visualization tool for all studies reporting rodent lifespan extension
Source: Aging (Albany NY). 2025 Mar 27;17(3):851–62. doi: 10.18632/aging.206228 (PMC11984422; doi:10.18632/aging.206228)
Supplement: Supplementary Data File 1 [file aging-17-206228-s001.xlsx]

## Sheet: RAID Data Table
record_id	pmid	url	intervention_1	intervention_shortname	age_init	int_type	species	strain	genetic_mod	sex	n_control	n_treatment	avg_type	avg_lifespan_ctrl	avg_lifespan_treat	avg_lifespan_tot_change	avg_lifespan_pct_change	avg_lifespan_p	max_definition	max_lifespan_ctrl	max_lifespan_treat	max_life_tot_change	max_life_pct_change	max_lifespan_p	notes	citation_title	citation_citation
174	33788371		17-α-estradiol	17-α-estradiol	Supplementary Data File 1. Supplementary raid data table and Statistical Overview of Lifespan Intervention Data (SOLID) Table.	Pharmaceutical	Mouse	UM‐HET3	None	Male	303	156	Median	787	933	146	19%	<0.0001	90th percentile	1047	1120	73	7%	0.004		17-a-estradiol late in life extends lifespan in aging UM-HET3 male mice; nicotinamide riboside and three other drugs do not affect lifespan in either sex	Aging Cell. 2021 May;20(5):e13328.
175	33788371		17-α-estradiol	17-α-estradiol	20	Pharmaceutical	Mouse	UM‐HET3	None	Male	303	159	Median	787	871	84	11%	0.007	90th percentile	Not significant	Not significant	Not significant	5%	0.174	The maximum lifespan extension was statistically insignificant (p=0.174)	17-a-estradiol late in life extends lifespan in aging UM-HET3 male mice; nicotinamide riboside and three other drugs do not affect lifespan in either sex	Aging Cell. 2021 May;20(5):e13328.
117	27312235		17-α-estradiol (14.4 ppm)	17-α-estradiol (14.4 ppm)	10	Pharmaceutical	Mouse	UM-HET3	None	Male	294	144	Median	780	925	145	19%	<0.001	90th percentile	1064	1193	129	12%	<0.001		Longer lifespan in male mice treated with a weakly estrogenic agonist, an antioxidant, an α-glucosidase inhibitor or a Nrf2-inducer	Aging Cell. 2016 Oct;15(5):872-84.
118	27312235		Acarbose (1,000 ppm in food)	Acarbose (1,000 ppm in food)	16	Pharmaceutical	Mouse	UM-HET3	None	Male	283	147	Median	823	875	52	6%	<0.001	90th percentile	1055	1183	128	12%	0.0001		Longer lifespan in male mice treated with a weakly estrogenic agonist, an antioxidant, an α-glucosidase inhibitor or a Nrf2-inducer	Aging Cell. 2016 Oct;15(5):872-84.
119	27312235		Acarbose (1,000 ppm in food)	Acarbose (1,000 ppm in food)	16	Pharmaceutical	Mouse	UM-HET3	None	Female	278	135	No Benefit	no benefit	no benefit	no benefit	no benefit	No benefit	90th percentile	1100	1166	66	6%	0.01		Longer lifespan in male mice treated with a weakly estrogenic agonist, an antioxidant, an α-glucosidase inhibitor or a Nrf2-inducer	Aging Cell. 2016 Oct;15(5):872-84.
149	30688027		Acarbose (1,000 ppm in food)	Acarbose (1,000 ppm in food)	4	Pharmaceutical	Mouse	UM-HET3	None	Male	273	161	Median	830	975	145	17%	<0.0001	90th percentile	1089	1210	121	11%	0.0004		Acarbose improves health and lifespan in aging HET3 mice	Aging Cell. 2019 Apr;18(2):e12898.
150	30688027		Acarbose (1,000 ppm in food)	Acarbose (1,000 ppm in food)	4	Pharmaceutical	Mouse	UM-HET3	None	Female	287	142	Median	889	933	44	5%	0.003	90th percentile	1097	1125	28	3%	0.007		Acarbose improves health and lifespan in aging HET3 mice	Aging Cell. 2019 Apr;18(2):e12898.
41	17662940		Adenylyl cyclase type 5 knockout	Adenylyl cyclase type 5 knockout	0	Genetic	Mouse	129/SvJ:C57BL/6:F1	AC5-KO	Pooled	25	13	Median	750	990	240	32%	<0.01	90th percentile	990	1110	120	12%	<0.02	The authors reported that the lifespan extension did not differ between males and females, which would reasonably explain why they reported pooled data.	Type 5 adenylyl cyclase disruption increases longevity and protects against stress	Cell. 2007 Jul 27;130(2):247-58.
132	28681509		Akt2 knockout	Akt2 knockout	0	Genetic	Mice	C57BL/6	Akt2 KO (-/-)	Male	31	31	Median	990	1080	90	9%	0.0058	90th percentile	990	1170	180	18%	Not reported	The authors may have chosen the wrong time points for their calculations of median lifespan, based on the survival curve presented in Figure 1A. Their figures and p-value for median lifespan were reported here, but the data reported here for the maximum lifespan (90th percentile) was estimated from the survival curve.	Akt2 ablation prolongs life span and improves myocardial contractile function with adaptive cardiac remodeling: role of Sirt1-mediated autophagy regulation	Aging Cell. 2017 Oct;16(5):976-987.
176	33796866		Amino acid restriction (life-long)	Amino acid restriction (life-long)	0	Dietary	Mouse	C57BL/6	None	Male	54	21	Median	754	1017	263	35%	0.033	75th percentile	911	1077	166	18%	Not reported	The lifespan benefit was observed only in males, and even then, only when administered lifelong (no effect when started in later life). The low-BCAA diet also caused elevated early mortality in females. The median and maximum lifespan data reported here is based on figures submitted by one of the authors via personal communication.	Lifelong restriction of dietary branched-chain amino acids has sex-specific benefits for frailty and lifespan in mice	Nat Aging. 2021 Jan;1(1):73-86.
53	19197138		Angiotensin II type 1a receptor knockout	Angiotensin II type 1a receptor knockout	0	Genetic	Mouse	F1 (C57BL/6 × 129/SvEv)	None	Male	10	20	Mean	744.3	936	191.7	26%	<0.0001	90th percentile	810	1020	210	26%	Not reported	The 90th percentile survival time was estimated from the survival curve in Figure 1 because it was not reported in the text otherwise. This positive effect on lifespan is remarkable both because of its magnitude and because it was apparently effective at every point of the lifespan. Here is a quote from the authors: "At 29 months, when all wild-type animals died, 17 AT1A-deficient mice (85%) were…	Disruption of the Ang II type 1 receptor promotes longevity in mice	J Clin Invest. 2009 Mar;119(3):524-30.
136	28943853		Arginase-II knockout	Arginase-II knockout	0	Genetic	Mouse	C57BL/6J	Arginase-II(-/-)	Female	26	26	Median	666	759	93	14%	<0.01	75th percentile	763	832	69	9%	<0.001		Arginase-II Deficiency Extends Lifespan in Mice	Front Physiol. 2017 Sep 8:8:682.
137	28943853		Arginase-II knockout	Arginase-II knockout	0	Genetic	Mouse	C57BL/6J	Arginase-II(-/-)	Male	41	52	Median	740	805	65	9%	<0.01	No benefit	No benefit	No benefit	No benefit	No benefit	No benefit		Arginase-II Deficiency Extends Lifespan in Mice	Front Physiol. 2017 Sep 8:8:682.
48	18631321		Aspirin (21 mg/kg of food)	Aspirin (21 mg/kg of food)	4	Pharmaceutical	Mouse	UM-HET3	None	Male	Not reported	Not reported	Median	786	849	63	8%	0.01	No benefit	No benefit	No benefit	No benefit	No benefit	No benefit	These results are unusual in that most of the positive effect for NDGA was found at UT, and for reasons unknown, UM male control mice lived significantly longer than control mice at the other two sites. When pooled across sites, a statistically significant positive effect on median lifespan was observed in males for both NDGA and aspirin. No positive effect was observed for females for either int…	Nordihydroguaiaretic acid and aspirin increase lifespan of genetically heterogeneous male mice	Aging Cell. 2008 Oct;7(5):641-50.
92	23939249		Atg5 overexpression	Atg5 overexpression	0	Genetic	Mouse	C57BL/6	None	Pooled	65	70	Median	700	819	119	17%	<0.001	Not reported	781	900	119	15%	<0.01	The percentage benefit in males and females was similar, so the authors reported some detailed data in the text as pooled sex data. That's what is reported here.	Overexpression of Atg5 in mice activates autophagy and extends lifespan	Nat Commun. 2013:4:2300.
177	33796866		Branched-chain amino acid restriction (life-long)	BCAA restriction (life-long)	0	Dietary	Mouse	C57BL/6	None	Male	54	30	Median	754	994	240	32%	0.037	75th percentile	911	1023	112	12%	Not reported	The lifespan benefit was observed only in males, and even then, only when administered lifelong (no effect when started in later life). The low-BCAA diet also caused elevated early mortality in females. The median and maximum lifespan data reported here is based on figures submitted by one of the authors via personal communication.	Lifelong restriction of dietary branched-chain amino acids has sex-specific benefits for frailty and lifespan in mice	Nat Aging. 2021 Jan;1(1):73-86.
140	29849149		Becln1 mutation (enhanced autophagy)	Becln1 mutation (enhanced autophagy)	0	Genetic	Mouse	C57BL/6	F121A mutation in Becln1	Pooled	68	102	Median	780	840	60	8%	0.0341	Not significant	1080	1170	90	8%	0.0341	Maximum lifespan extension for males and females separately did not reach significance, only pooled data did.	Disruption of the beclin 1-BCL2 autophagy regulatory complex promotes longevity in mice	Nature. 2018 Jun;558(7708):136-140.
141	29849149		Becln1 mutation (enhanced autophagy)	Becln1 mutation (enhanced autophagy)	0	Genetic	Mouse	C57BL/6	F121A mutation in Becln1	Male	37	59	Median	750	840	90	12%	0.0004	Not significant	Not significant	Not significant	Not significant	Not significant	0.0881	Maximum lifespan extension for males and females separately did not reach significance, only pooled data did.	Disruption of the beclin 1-BCL2 autophagy regulatory complex promotes longevity in mice	Nature. 2018 Jun;558(7708):136-140.
142	29849149		Becln1 mutation (enhanced autophagy)	Becln1 mutation (enhanced autophagy)	0	Genetic	Mouse	C57BL/6	F121A mutation in Becln1	Female	31	43	Median	810	900	90	11%	0.0004	Not significant	Not significant	Not significant	Not significant	Not significant	0.0605	Maximum lifespan extension for males and females separately did not reach significance, only pooled data did.	Disruption of the beclin 1-BCL2 autophagy regulatory complex promotes longevity in mice	Nature. 2018 Jun;558(7708):136-140.
158	31773901		Berberine (50 mg/kg for 4 months)	Berberine (50 mg/kg for 4 months)	18	Pharmaceutical	Mouse	C57BL/6J	None	Male	22	22	Median	600	700	100	17%	<0.007	Not reported	Not reported	Not reported	Not reported	Not reported	Not reported	The median lifespan data was reported as significant but was not listed in numerical format (median lifespan in days). Maximus Peto estimated them from the survival curve in Figure 5d and reported his estimates here.	Berberine ameliorates cellular senescence and extends the lifespan of mice via regulating p16 and cyclin protein expression	Aging Cell. 2020 Jan;19(1):e13060.
93	23967009		Bone marrow transplants, young to old, nonmyeloablative, "massive" number of cells (150 million)	Bone marrow transplants, young to old	21.5	Cellular	Mouse	C57BL/6	None	Female	10	9	Median	753	792	39	5%	Not reported	Not reported	819	870	51	6%	Not reported	The survival curve only considers the mice from 21.5 months and onward (no mortality data before that point), so assessment of median lifespan might be inaccurate. There also appear to be no p-values reported. Also note that the investigators wanted to transplant 150 million bone marrow cells and tried to do this in one injection. They reported: "Most mice died within 2-10 minutes." So they tried…	Effect on lifespan of high yield non-myeloablating transplantation of bone marrow from young to old mice	Front Genet. 2013 Aug 7:4:144.
154	31031800		Bone marrow transplants, young to old, nonmyeloablative	Bone marrow transplants, young to old	15	Cellular	Mouse	B10-GFP	GFP transgenic	Not reported	20	56	Not reported	Initiated at median	Initiated at median	Initiated at median	Initiated at median	Initiated at median	90th percentile	553.5	684	130.5	24%	0.05	This increase in maximum lifespan reported here is after exclusion of animals with embolisms from the transplants, so this data does not account for the risks associated with transplantation.	Extension of Maximal Lifespan and High Bone Marrow Chimerism After Nonmyeloablative Syngeneic Transplantation of Bone Marrow From Young to Old Mice	Front Genet. 2019 Apr 12:10:310.
69	20889128		Branched-chain amino acid supplementation	Branched-chain amino acid supplementation	9	Dietary	Mouse	C57BL/6J and 129S1/SvImJ mice	None	Male	30	30	Median	774	869	95	12%	0.0043	90th percentile	938	981	43	5%	0.0043		Branched-chain amino acid supplementation promotes survival and supports cardiac and skeletal muscle mitochondrial biogenesis in middle-aged mice	Cell Metab. 2010 Oct 6;12(4):362-372.
163	32559200		Brd2 haploinsufficiency (Brd2+/-)	Brd2 haploinsufficiency (Brd2+/-)	0	Genetic	Mouse	C57B6/J	Brd2(+/-)	Male	34	33	Median	781	925	144	18%	<0.0001	90th percentile	800	1200	400	50%	Not reported	The longest-lived mouse (a female) lived a remarkable 1,528 days. Maximum lifespan data was not reported; Maximus Peto estimated them from the survival curve in Figure 1C.	Brd2 haploinsufficiency extends lifespan and healthspan in C57B6/J mice	PLoS One. 2020 Jun 19;15(6):e0234910.
164	32559200		Brd2 haploinsufficiency (Brd2+/-)	Brd2 haploinsufficiency (Brd2+/-)	0	Genetic	Mouse	C57B6/J	Brd2(+/-)	Female	25	39	Median	702	1023	321	46%	<0.0001	90th percentile	850	1300	450	53%	Not reported	The longest-lived mouse (a female) lived a remarkable 1,528 days. Maximum lifespan data was not reported; Maximus Peto estimated them from the survival curve in Figure 1C.	Brd2 haploinsufficiency extends lifespan and healthspan in C57B6/J mice	PLoS One. 2020 Jun 19;15(6):e0234910.
80	22498298		C60 fullerene (5 mg/mL) in olive oil vehicle (1 mL daily for 1 week, weekly for 1 month, bi-monthly for 5 months). Stopped at month 17 (7 months after starting administration).	C60 fullerene in olive oil vehicle (see notes)	10	Pharmaceutical	Rats	Wistar	None	Male	6	6	Median	960	1890	930	97%	see note	Last rat (1/6)	1110	1980	870	78%	see note	The lifespan extension of the C60 fullerene administration group is remarkable, yet there were only 6 rats in each group and the p-values are not clear from the text. The authors wrote: "The log-rank test leads to c2 values (one degree of freedom) of 7.009, 11.302, and 10.454, when we compare water-treated and olive oil-treated rats, water-treated and C60-treated rats, and olive oil-treated and C…	The prolongation of the lifespan of rats by repeated oral administration of [60]fullerene	Biomaterials. 2012 Jun;33(19):4936-46.
18	8415944		Calorie restriction (20-40% in late life)	Calorie restriction (20-40% in late life)	14	Dietary	Mouse	C57BL/6	None	Male	47	47	Median	645	765	120	19%	Not reported	Longest-lived	877	953	76	9%	Not reported	This study seems to include data which suggests that functional testing in mice has the potential to shorten their lifespans.	Mid-life onset of dietary restriction extends life and prolongs cognitive functioning	Physiol Behav. 1993 Sep;54(3):503-8.
6	3958810		Calorie restriction (25%) + intermittent fasting (once daily feeding except Fridays)	Calorie restriction (25%) + intermittent fasting	1	Dietary	Mouse	C3H.SW/Sn x C57BL10.RIII	None	Female	49	57	Mean	822	981	159	19%	0.05	90th percentile	1053	1191	138	13%	0.05		The retardation of aging in mice by dietary restriction: longevity, cancer, immunity and lifetime energy intake	J Nutr. 1986 Apr;116(4):641-54.
61	20304770		Calorie restriction (30%)	Calorie restriction (30%)	6	Dietary	Rat	Fischer-344	None	Male	31	40	Mean	796	866	70	9%	Not significant	No benefit	No benefit	No benefit	No benefit	No benefit	No benefit	These figures were reported even though they were not significant because of the desire to notify readers about the inconsistency of metformin at extending rodent lifespan. Moreover, there appear to be at least three interesting lessons to consider from this study: (1) that metformin failed to extend lifespan, (2) that CR extended median and mean lifespan, but did not lengthen the maximum lifespa…	Metformin supplementation and life span in Fischer-344 rats	J Gerontol A Biol Sci Med Sci. 2010 May;65(5):468-74.
63	20819793		Calorie restriction (30%)	Calorie restriction (30%)	1	Dietary	Mouse	UM-HET3	None	Male	14	16	Mean	831	1101	270	32%	<0.0001	Avg. age of oldest 2 mice (2/16 = 88nd percentile)	1217.5	1419	201.5	17%	Not reported	The extension in maximum lifespan looks highly significant from the survival curves, but a a p-value associated with the maximum lifespan data (average of the oldest-lived two mice in each group) reported was not identified. Therefore, the p-value is shown as "not reported" for this data.	Life extension by diet restriction and N-acetyl-L-cysteine in genetically heterogeneous mice	J Gerontol A Biol Sci Med Sci. 2010 Dec;65(12):1275-84.
64	20819793		Calorie restriction (30%)	Calorie restriction (30%)	1	Dietary	Mouse	UM-HET3	None	Female	16	16	Mean	836	1169	333	40%	<0.0001	Avg. age of oldest 2 mice (2/16 = 88nd percentile)	1013	1382.5	369.5	36%	Not reported	The extension in maximum lifespan looks highly significant from the survival curves, but a a p-value associated with the maximum lifespan data (average of the oldest-lived two mice in each group) reported was not identified. Therefore, the p-value is shown as "not reported" for this data.	Life extension by diet restriction and N-acetyl-L-cysteine in genetically heterogeneous mice	J Gerontol A Biol Sci Med Sci. 2010 Dec;65(12):1275-84.
65	20819793		Calorie restriction (30%)	Calorie restriction (30%)	1	Dietary	Mouse	CByB6F1	None	Male	16	16	Mean	839	1154	315	38%	<0.0001	Avg. age of oldest 2 mice (2/16 = 88nd percentile)	1108	1370	262	24%	Not reported	The extension in maximum lifespan looks highly significant from the survival curves, but a a p-value associated with the maximum lifespan data (average of the oldest-lived two mice in each group) reported was not identified. Therefore, the p-value is shown as "not reported" for this data.	Life extension by diet restriction and N-acetyl-L-cysteine in genetically heterogeneous mice	J Gerontol A Biol Sci Med Sci. 2010 Dec;65(12):1275-84.
66	20819793		Calorie restriction (30%)	Calorie restriction (30%)	1	Dietary	Mouse	CByB6F1	None	Female	16	16	Mean	859	1283	424	49%	<0.0001	Avg. age of oldest 2 mice (2/16 = 88nd percentile)	1171	1537	366	31%	Not reported	The extension in maximum lifespan looks highly significant from the survival curves, but a a p-value associated with the maximum lifespan data (average of the oldest-lived two mice in each group) reported was not identified. Therefore, the p-value is shown as "not reported" for this data.	Life extension by diet restriction and N-acetyl-L-cysteine in genetically heterogeneous mice	J Gerontol A Biol Sci Med Sci. 2010 Dec;65(12):1275-84.
190	35511946		Calorie restriction (30%) + 12-hr fast + circadian feeding	Calorie restriction (30%) + 12-hr fast + circadian feeding	2	Multiple	Mouse	C57BL/6J	None	Male	44	33	Median	792	1058	266	34%	<0.0001	Not reported	Not reported	Not reported	Not reported	Not reported	Not reported	Intervention consisted of 30% CR with three different fasting conditions and two different feeding timings. Longer fasting periods and feeding timing associated with waking hours was associated with longer lifespan. Maximum lifespan appears to have been assessed but not reported conventionally. See Data Supplement 1.	Circadian alignment of early onset caloric restriction promotes longevity in male C57BL/6J mice	Science. 2022 Jun 10;376(6598):1192-1202.
191	35511946		Calorie restriction (30%) + 12-hr fast + inverse circadian feeding	Calorie restriction (30%) + 12-hr fast + inverse circadian feeding	2	Multiple	Mouse	C57BL/6J	None	Male	44	34	Median	792	942	150	19%	0.0001	Not reported	Not reported	Not reported	Not reported	Not reported	Not reported	Intervention consisted of 30% CR with three different fasting conditions and two different feeding timings. Longer fasting periods and feeding timing associated with waking hours was associated with longer lifespan. Maximum lifespan appears to have been assessed but not reported conventionally. See Data Supplement 1.	Circadian alignment of early onset caloric restriction promotes longevity in male C57BL/6J mice	Science. 2022 Jun 10;376(6598):1192-1202.
192	35511946		Calorie restriction (30%) + 22-hr fast + circadian feeding	Calorie restriction (30%) + 22-hr fast + circadian feeding	2	Multiple	Mouse	C57BL/6J	None	Male	44	34	Median	792	1068	276	35%	<0.0001	Not reported	Not reported	Not reported	Not reported	Not reported	Not reported	Intervention consisted of 30% CR with three different fasting conditions and two different feeding timings. Longer fasting periods and feeding timing associated with waking hours was associated with longer lifespan. Maximum lifespan appears to have been assessed but not reported conventionally. See Data Supplement 1.	Circadian alignment of early onset caloric restriction promotes longevity in male C57BL/6J mice	Science. 2022 Jun 10;376(6598):1192-1202.
193	35511946		Calorie restriction (30%) + 22-hr fast + inverse circadian feeding	Calorie restriction (30%) + 22-hr fast + inverse circadian feeding	2	Multiple	Mouse	C57BL/6J	None	Male	44	34	Median	792	959	167	21%	0.0002	Not reported	Not reported	Not reported	Not reported	Not reported	Not reported	Intervention consisted of 30% CR with three different fasting conditions and two different feeding timings. Longer fasting periods and feeding timing associated with waking hours was associated with longer lifespan. Maximum lifespan appears to have been assessed but not reported conventionally. See Data Supplement 1.	Circadian alignment of early onset caloric restriction promotes longevity in male C57BL/6J mice	Science. 2022 Jun 10;376(6598):1192-1202.
194	35511946		Calorie restriction (30%) only (24-hr feeding)	Calorie restriction (30%) only (24-hr feeding)	2	Dietary	Mouse	C57BL/6J	None	Male	44	35	Median	792	875	83	10%	0.0061	Not reported	Not reported	Not reported	Not reported	Not reported	Not reported	Intervention consisted of 30% CR with three different fasting conditions and two different feeding timings. Longer fasting periods and feeding timing associated with waking hours was associated with longer lifespan. Maximum lifespan appears to have been assessed but not reported conventionally. See Data Supplement 1.	Circadian alignment of early onset caloric restriction promotes longevity in male C57BL/6J mice	Science. 2022 Jun 10;376(6598):1192-1202.
94	24175087		Calorie restriction (40%)	Calorie restriction (40%)	3	Multiple	Mouse	C57BL6/129SV	GHRH-KO	Male	56	53	Median	614	760	146	24%	Not reported	90th percentile	875	1075	200	23%	Not reported	These are remarkable percent increases in median lifespan. However, it might be important to note that the control mice are short lived (~630 days) relative to normal C57BL/6 or UM-HET3 mice (~825 days). Also, number of days lived had to be estimated from the survival curves for the 90th percentile figures as these weren't reported in the text (nor were the p-values). Important: there seems to be…	Growth hormone-releasing hormone disruption extends lifespan and regulates response to caloric restriction in mice	Elife. 2013 Oct 29:2:e01098.
95	24175087		Calorie restriction (40%)	Calorie restriction (40%)	3	Multiple	Mouse	C57BL6/129SV	GHRH-KO	Female	52	52	Median	666	1000	334	50%	Not reported	90th percentile	900	1175	275	31%	Not reported	These are remarkable percent increases in median lifespan. However, it might be important to note that the control mice are short lived (~630 days) relative to normal C57BL/6 or UM-HET3 mice (~825 days). Also, number of days lived had to be estimated from the survival curves for the 90th percentile figures as these weren't reported in the text (nor were the p-values). Important: there seems to be…	Growth hormone-releasing hormone disruption extends lifespan and regulates response to caloric restriction in mice	Elife. 2013 Oct 29:2:e01098.
214	15044709	https://www.ncbi.nlm.nih.gov/pmc/articles/PMC397416/	Calorie restriction (40%)	Calorie restriction (40%)	19	Dietary	Mouse	F1 hybrid B6C3F1	None	Male	60	60	Mean	921	1062	141	15%	0.000017	Average age of last 10% surviving	1128	1308	180	16%	0.000056	This study appears to have been done in male mice only.	Temporal linkage between the phenotypic and genomic responses to caloric restriction	Proc Natl Acad Sci U S A. 2004 Apr 13;101(15):5524-9.
46	18486188		Calorie restriction (45%)	Calorie restriction (45%)	2	Dietary	Rat	BN	None	Male	102	75	Median	926	1047	121	13%	<0.0001	90th percentile	1020	1075	55	5%	Not reported	The authors had many intervention groups and appeared to be focused just as much on body weight trends throughout the lifespan as lifespan itself. Still, the two outcomes of interest appear to be life extension in the CR-only group (starting at 2 months) and the CR+alpha-lipoic acid group (starting at 12 months). One outcome of interest is that 4 months of alpha-lipoic acid supplementation (ages …	Dietary lipoic acid supplementation can mimic or block the effect of dietary restriction on life span	Mech Ageing Dev. 2008 Jun;129(6):341-8.
47	18486188		Calorie restriction (45%)	Calorie restriction (45%)	12	Multiple	Rat	BN	None	Male	102	25	Median	926	1031	105	11%	Not reported	90th percentile	1020	1090	70	7%	Not reported	The authors had many intervention groups and appeared to be focused just as much on body weight trends throughout the lifespan as lifespan itself. Still, the two outcomes of interest appear to be life extension in the CR-only group (starting at 2 months) and the CR+alpha-lipoic acid group (starting at 12 months). One outcome of interest is that 4 months of alpha-lipoic acid supplementation (ages …	Dietary lipoic acid supplementation can mimic or block the effect of dietary restriction on life span	Mech Ageing Dev. 2008 Jun;129(6):341-8.
7	3958810		Calorie restriction (55%) + 48-to-72-hour fasting + higher-protein chow (35% casein)	Calorie restriction (55%) + 48-to-72-hour fasting	1	Dietary	Mouse	C3H.SW/Sn x C57BL10.RIII	None	Female	49	71	Mean	822	1269	447	54%	0.05	90th percentile	1053	1533	480	46%	0.05		The retardation of aging in mice by dietary restriction: longevity, cancer, immunity and lifetime energy intake	J Nutr. 1986 Apr;116(4):641-54.
8	3958810		Calorie restriction (55%) + 48-to-72-hour fasting + progressively reduced protein during aging	Calorie restriction (55%) + 48-to-72-hour fasting	1	Dietary	Mouse	C3H.SW/Sn x C57BL10.RIII	None	Female	49	56	Mean	822	1191	369	45%	0.05	90th percentile	1053	1455	402	38%	0.05		The retardation of aging in mice by dietary restriction: longevity, cancer, immunity and lifetime energy intake	J Nutr. 1986 Apr;116(4):641-54.
9	3958810		Calorie restriction (65%) + 48-tto-72-hour fasting + higher protein chow (35% casein)	Calorie restriction (65%) + 48-to-72-hour fasting	1	Dietary	Mouse	C3H.SW/Sn x C57BL10.RIII	None	Female	49	60	Mean	822	1353	531	65%	0.05	90th percentile	1053	1590	537	51%	0.05		The retardation of aging in mice by dietary restriction: longevity, cancer, immunity and lifetime energy intake	J Nutr. 1986 Apr;116(4):641-54.
114	26695614		Calorie restriction (10%)	Calorie restriction, 10%	1.5	Dietary	Rat	F344	None	Male	40	40	Mean	796	918	122	15%	<0.001	90th percentile	974	1090	116	12%	<0.001	A noteworthy finding in this study was that the 10% CR group had a similar extension of median lifespan as did the 40% CR group.	Significant life extension by ten percent dietary restriction	Ann N Y Acad Sci. 2016 Jan;1363(1):11-7.
145	30197301		Calorie restriction (30%)	Calorie restriction, 30%	4	Dietary	Mouse	C57BL/6J	None	Male	45	59	Median	725.9	980.7	254.8	35%	<0.001	75th percentile	842.8	980.7	137.9	16%	<0.001	There appears to have been a benefit to maximum lifespan in the CR group and not the limited eating window group, but this effect was apparently not reported in the text.	Daily Fasting Improves Health and Survival in Male Mice Independent of Diet Composition and Calories	Cell Metab. 2019 Jan 8;29(1):221-228.e3.
85	23314750		Calorie restriction (40%)	Calorie restriction, 40%	12	Dietary	Mouse	C3B6F1	None	Male	Not reported	36	Median	983	1191	208	21%	<0.001	90th percentile	1200	1420	220	18%	Not reported	The maximum lifespan extension from 40% CR was not reported in the text, only in Figure 1c, so it was estimated from this figure.	β1-Adrenergic receptor blockade extends the life span of Drosophila and long-lived mice	Age (Dordr). 2013 Dec;35(6):2099-109.
115	26695614		Calorie restriction (40%)	Calorie restriction, 40%	1.5	Dietary	Rat	F344	None	Male	40	40	Mean	796	947	151	19%	<0.001	90th percentile	974	1223	249	26%	<0.001	A noteworthy finding in this study was that the 10% CR group had a similar extension of median lifespan as did the 40% CR group.	Significant life extension by ten percent dietary restriction	Ann N Y Acad Sci. 2016 Jan;1363(1):11-7.
54	19414512		Calorie restriction, pre-weaning only (days 1-20) via 50% litter expansion	Calorie restriction, pre-weaning only	0	Dietary	Mouse	UM-HET3	None	Female	Not reported	Not reported	Median	731	848	117	16%	0.003	Not reported	Not reported	Not reported	Not reported	Not reported	Not reported	Given the significant effect on median and maximum lifespan for the pooled sex data, I suspect this intervention prolonged maximum lifespan in females too, but this female-specific maximum lifespan data was not reported in the study, so it was not report in RAID (as of 2024/02/13).	Life-span extension in mice by preweaning food restriction and by methionine restriction in middle age	J Gerontol A Biol Sci Med Sci. 2009 Jul;64(7):711-22.
55	19414512		Calorie restriction, pre-weaning only (days 1-20) via 50% litter expansion	Calorie restriction, pre-weaning only	0	Dietary	Mouse	UM-HET3	None	Pooled	25	36	Median	See notes	See notes	See notes	See notes	See notes	90th percentile	950	1075	125	13%	Not reported	The authors reported the pooled data (both sexes) showing a significant extension of median lifespan. However, males did not show a statistically significant effect while females did. Thus, I was reluctant to report the pooled data for median lifespan. However, the authors did not report sex-specific data for maximum lifespan, so only this pooled data is reported in RAID (as of 2024/02/13). It wa…	Life-span extension in mice by preweaning food restriction and by methionine restriction in middle age	J Gerontol A Biol Sci Med Sci. 2009 Jul;64(7):711-22.
10	3958810		Pre-weaning calorie restriction + CR (55%) + 48-hour fasting + higher-protein chow (35% casein)	Calorie restriction, pre-weaning, then 55% + 48-hour fasting	0	Dietary	Mouse	C3H.SW/Sn x C57BL10.RIII	None	Female	49	56	Mean	822	1287	465	57%	0.05	90th percentile	1053	1515	462	44%	0.05		The retardation of aging in mice by dietary restriction: longevity, cancer, immunity and lifetime energy intake	J Nutr. 1986 Apr;116(4):641-54.
167	32990681		Canagliflozin (180 ppm in food)	Canagliflozin (180 ppm in food)	7	Pharmaceutical	Mouse	UM-HET3	None	Male	303	156	Median	787	897	110	14%	<0.0001	90th percentile	1047	1143	96	9%	<0.0001	There was no positive effect observed in female mice.	Canagliflozin extends life span in genetically heterogeneous male but not female mice	JCI Insight. 2020 Nov 5;5(21):e140019.
204	36179270		Captopril	Captopril	5	Pharmaceutical	Mouse	UM-HET3	None	Male	285	150	Median	718	821	103	14%	0.001	90th percentile	1029	1097	68	6%	0.01	There was some considerable variation between test sites in results.	Lifespan benefits for the combination of rapamycin plus acarbose and for captopril in genetically heterogeneous mice	Aging Cell. 2022 Dec;21(12):e13724.
205	36179270		Captopril	Captopril	5	Pharmaceutical	Mouse	UM-HET3	None	Female	276	132	Median	868	915	47	5%	0.002	90th percentile	1060	1144	84	8%	0.02	There was some considerable variation between test sites in results.	Lifespan benefits for the combination of rapamycin plus acarbose and for captopril in genetically heterogeneous mice	Aging Cell. 2022 Dec;21(12):e13724.
36	17079053		Carboxyfullerene (10 mg/kg/day in drinking water)	Carboxyfullerene (in drinking water)	12	Pharmaceutical	Mouse	C57BL/6	None	Pooled	45	46	Median	720	825	105	15%	0.004	90th percentile	855	1020	165	19%	Not reported	The authors apparently did not report maximum lifespan data in the text, only the survival curve, so the 90th percentile of survival was estimated from Figure 2a (pooled, uncensored data).	A carboxyfullerene SOD mimetic improves cognition and extends the lifespan of mice	Neurobiol Aging. 2008 Jan;29(1):117-28.
31	15879174		Human catalase overexpression in mitochondria	Catalase overexpression (in mitochondria)	0	Genetic	Mouse	B6C3F1	Catalase overexpression	Pooled	44	20	Median	786	951	165	21%	0.0002	90th pecentile	900	1050	150	17%	0.0002		Extension of murine life span by overexpression of catalase targeted to mitochondria	Science. 2005 Jun 24;308(5730):1909-11.
32	15879174		Human catalase overexpression in peroxisomes	Catalase overexpression (in peroxisomes)	0	Genetic	Mouse	B6C3F1	Catalase overexpression	Pooled	22	36	Median	808	913	105	13%	0.02	No benefit	No benefit	No benefit	No benefit	No benefit	No benefit		Extension of murine life span by overexpression of catalase targeted to mitochondria	Science. 2005 Jun 24;308(5730):1909-11.
39	17201740		Catalase overexpression in heart	Catalase overexpression in heart	0	Genetic	Mouse	FVB	Catalase overexpression	Male	35	35	Median	810	900	90	11%	<0.05	90th percentile	1080	1200	120	11%	<0.05		Cardiac-specific overexpression of catalase prolongs lifespan and attenuates ageing-induced cardiomyocyte contractile dysfunction and protein damage	Clin Exp Pharmacol Physiol. 2007 Jan-Feb;34(1-2):81-7.
187	35263032		CD8 inhibition (via small molecule 78c)	CD8 inhibition (via small molecule 78c)	12	Pharmaceutical	Mouse	C57BL/6	None	Male	30	15	Median	787	904	117	15%	0.008	Not reported	963	1099	136	14%	0.041	It was tested in females but they found no increase in median or maximum lifespan.	CD38 inhibitor 78c increases mice lifespan and healthspan in a model of chronological aging	Aging Cell. 2022 Apr;21(4):e13589.
165	32755011		Cdc42 inhibitor (CASIN) for only 4 days	Cdc42 inhibitor (CASIN) for only 4 days	17.3	Pharmaceutical	Mouse	C57BL/6	None	Female	18	17	Median	864.5	952	87.5	10%	<0.0004	90th percentile	938	1099	161	17%	Not reported	A remarkable finding in this study is that the intervention was administered late in life and for only 4 sequential days. The exact maximum lifespan extension was not reported in the text. The figure reported here was estimated from the surivival curve in Figure 1d.	Inhibition of Cdc42 activity extends lifespan and decreases circulating inflammatory cytokines in aged female C57BL/6 mice	Aging Cell. 2020 Sep;19(9):e13208.
186	35023015		Chloroquine (0.1 mg/kg in water)	Chloroquine (0.1 mg/kg in water)	24	Pharmaceutical	Rat	Sprague Dawley	None	Male	13	9	Median	Not reported	Not reported	Not reported	6%	0.02	Not reported	Not reported	Not reported	Not reported	13%	0.02	This appears to be a brief report to an editor and did not include detailed statistical information (only a figure of a survival curve and % lifespan extension figures appear to have been reported).	Low-dose chloroquine treatment extends the lifespan of aged rats	Protein Cell. 2022 Jun;13(6):454-461.
197	35609021		Chloroquine (50 mg/kg in drinking water)	Chloroquine (50 mg/kg in drinking water)	16.6	Pharmaceutical	Mouse	NMRI	None	Male	28	28	Median	Not reported	Not reported	Not reported	11%	Not reported	Not reported	689	786	97	14%	0.0002	The statistical details about median and maximum lifespan extension do not seem to appear in the full report, nor is there apparently any data supplement containing them.	Long-term treatment with chloroquine increases lifespan in middle-aged male mice possibly via autophagy modulation, proteasome inhibition and glycogen metabolism	Aging (Albany NY). 2022 May 23;14(10):4195-4210.
138	29506242		Cohabitation with younger adult mice	Cohabitation with younger adult mice	21	Behavioral	Mouse	ICR-CD1	None	Female	8	8	Median	749	910	161	21%	<0.001	Not reported	Not reported	Not reported	Not reported	Not reported	Not reported		Improvements in Behavior and Immune Function and Increased Life Span of Old Mice Cohabiting With Adult Animals	J Gerontol A Biol Sci Med Sci. 2018 Jun 14;73(7):873-881.
144	29988130		Dasatinib and quercetin, bi-weekly	Dasatinib and quercetin, bi-weekly	24	Pharmaceutical	Mouse	C57BL/6	None	Male	41	40	Median	980	1024	44	4%	<0.05	Not reported	Not reported	Not reported	Not reported	Not reported	Not reported	The intervention only appeared to have a very mild positive effect on male median lifespan and possibly female maximum lifespan, though the latter was not reported except in the survival curve in Supplementary Figure 14b.	Senolytics improve physical function and increase lifespan in old age	Nat Med. 2018 Aug;24(8):1246-1256.
19	8423709		Deprenyl, chronic treatment (0.5 mg/kg, 3x/week)	Deprenyl	18	Pharmaceutical	Rats	Fischer-344	None	Male	35	35	Mean	876	926	50	6%	<0.05	No benefit	No benefit	No benefit	No benefit	No benefit	No benefit		Chronic treatment of (-)deprenyl prolongs the life span of male Fischer 344 rats. Further evidence	Life Sci. 1993;52(3):281-8.
12	8290600	https://www.ncbi.nlm.nih.gov/pmc/articles/PMC43034/pdf/pnas01533-0367.pdf	Engraftment of young pineal gland into thymus	Engraftment of young pineal gland into thymus	16	Surgical	Mouse	C57BL/6	None	Female	Not reported	Not reported	Not reported	741	867	126	17%	<0.05	Not reported	Not reported	Not reported	Not reported	Not reported	Not reported		Pineal control of aging: effect of melatonin and pineal grafting on aging mice	Proc Natl Acad Sci U S A. 1994 Jan 18;91(2):787-91.
13	8290600	https://www.ncbi.nlm.nih.gov/pmc/articles/PMC43034/pdf/pnas01533-0367.pdf	Engraftment of young pineal gland into thymus	Engraftment of young pineal gland into thymus	19	Surgical	Mouse	C57BL/6-BALB/cJ hybrid	None	Female	Not reported	Not reported	Not reported	657	4.6	-652.4	21%	<0.01	Not reported	Not reported	Not reported	Not reported	Not reported	Not reported		Pineal control of aging: effect of melatonin and pineal grafting on aging mice	Proc Natl Acad Sci U S A. 1994 Jan 18;91(2):787-91.
14	8290600	https://www.ncbi.nlm.nih.gov/pmc/articles/PMC43034/pdf/pnas01533-0367.pdf	Engraftment of young pineal gland into thymus	Engraftment of young pineal gland into thymus	22	Surgical	Mouse	BALB/cJ	None	Female	Not reported	Not reported	Not reported	722.1	917.1	195	27%	<0.05	Not reported	Not reported	Not reported	Not reported	Not reported	Not reported		Pineal control of aging: effect of melatonin and pineal grafting on aging mice	Proc Natl Acad Sci U S A. 1994 Jan 18;91(2):787-91.
15	8290600	https://www.ncbi.nlm.nih.gov/pmc/articles/PMC43034/pdf/pnas01533-0367.pdf	Engraftment of young pineal gland into thymus	Engraftment of young pineal gland into thymus	20	Surgical	Mouse	C57BL/6	None	Male	Not reported	Not reported	Not reported	Not reported	Not reported	Not reported	12%	Not reported	Longest-lived	747	1035	288	39%	Not reported		Pineal control of aging: effect of melatonin and pineal grafting on aging mice	Proc Natl Acad Sci U S A. 1994 Jan 18;91(2):787-91.
172	33260150		Etanercept (TNF-α inhibitor)	Etanercept (TNF-α inhibitor)	16	Pharmaceutical	Mouse	C57/BL6	None	Female	23	23	Not reported	Not reported	Not reported	Not reported	Not reported	Not reported	90th percentile	675	818	143	21%	Not reported	The maximum lifespan data was not reported in the text. The data reported here was estimated from Figure 2C.	Pharmacological blockade of TNFα prevents sarcopenia and prolongs survival in aging mice	Aging (Albany NY). 2020 Nov 26;12(23):23497-23508.
147	30233703		Exercise	Exercise	3	Behavioral	Rat	Sprague Dawley	None	Male	22	22	Median	1064	1142.5	78.5	7%	<0.0001	90th percentile	1175	1375	200	17%	Not reported	The intervention appears to have had a larger effect on maximum lifespan at the 90th percentile, but this data was not reported by the authors except in the image of the survival curve. This data was estimated from the survival curve and reported here.	Aerobic exercise-stimulated Klotho upregulation extends life span by attenuating the excess production of reactive oxygen species in the brain and kidney	Exp Ther Med. 2018 Oct;16(4):3511-3517.
29	14615275	https://journals.physiology.org/doi/full/10.1152/ajpregu.00208.2003	Exercise, 15 min/week from ages 28-78 weeks	Exercise, 15 min/week	6.5	Behavioral	Mouse	CD-1	Unknown	Male	Not reported	40	Median	483	567	84	17%	<0.05	90th percentile	595	686	91	15%	<0.05		Beneficial effects of moderate exercise on mice aging: survival, behavior, oxidative stress, and mitochondrial electron transfer	Am J Physiol Regul Integr Comp Physiol. 2004 Mar;286(3):R505-11.
30	14615275	https://journals.physiology.org/doi/full/10.1152/ajpregu.00208.2003	Exercise, 15 min/week from ages 28-78 weeks	Exercise, 15 min/week	6.5	Behavioral	Mouse	CD-1	Unknown	Female	Not reported	40	Median	567	623	56	10%	<0.05	90th percentile	742	798	56	8%	0.05		Beneficial effects of moderate exercise on mice aging: survival, behavior, oxidative stress, and mitochondrial electron transfer	Am J Physiol Regul Integr Comp Physiol. 2004 Mar;286(3):R505-11.
109	26094889		Fasting-mimicking diet	Fasting-mimicking diet	16	Dietary	Mouse	C57Bl/6	None	Female	46	21	Mean	765	849	84	11%	<0.01	No benefit	No benefit	No benefit	No benefit	No benefit	No benefit	There seemed to be an even larger protective effect earlier in the late-life survival curve (ages 20-27 months).	A Periodic Diet that Mimics Fasting Promotes Multi-System Regeneration, Enhanced Cognitive Performance, and Healthspan	Cell Metab. 2015 Jul 7;22(1):86-99.
102	24706839		FAT10 knockout	FAT10 knockout	0	Genetic	Mouse	C57BL/6 WT	FAT10 knockout	Male	52	114	Median	850	990	140	16%	<0.0001	90th percentile	950	1150	200	21%	<0.0001	The exact lifespan data (in days or percentage difference) was not reported for median or maximum lifespan. These data were estimated from the survival curve presented in Figure 1.	Extended lifespan and reduced adiposity in mice lacking the FAT10 gene	Proc Natl Acad Sci U S A. 2014 Apr 8;111(14):5313-8.
103	24706839		FAT10 knockout	FAT10 knockout	0	Genetic	Mouse	C57BL/6 WT	FAT10 knockout	Female	60	126	Median	890	1025	135	15%	<0.0001	90th percentile	960	1125	165	17%	<0.0001	The exact lifespan data (in days or percentage difference) was not reported for median or maximum lifespan. These data were estimated from the survival curve presented in Figure 1.	Extended lifespan and reduced adiposity in mice lacking the FAT10 gene	Proc Natl Acad Sci U S A. 2014 Apr 8;111(14):5313-8.
83	23066506		FGF21 overexpression	FGF21 overexpression	0	Genetic	Mouse	C57Bl/6J	FGF21 overexpression	Male	32	37	Median	837	1086	249	30%	0.00017	95th percentile	1107	1299	192	17%	0.00017		The starvation hormone, fibroblast growth factor-21, extends lifespan in mice	Elife. 2012 Oct 15:1:e00065.
84	23066506		FGF21 overexpression	FGF21 overexpression	0	Genetic	Mouse	C57Bl/6J	FGF21 overexpression	Female	35	40	Median	864	1203	339	39%	<0.0001	Not reported	Not reported	Not reported	Not reported	Not reported	Not reported	The female maximum lifespan data is remarkable, but it looks as though the study hadn't yet finished at the time of publication, so it was not report it here (35% of the mice were still alive at ~44 months).	The starvation hormone, fibroblast growth factor-21, extends lifespan in mice	Elife. 2012 Oct 15:1:e00065.
148	30279143		Fisetin (in late life)	Fisetin (in late life)	20	Pharmaceutical	Mouse	C57BL/6:FVB	None	Pooled	9	9	Median	770	896	126	16%	<0.05	90th percentile	840	910	70	8%	<0.05	The authors reported a survival curve in Figure 5A but apparently reported no exact data about number of days lived in the control group or intervention group for either median or maximum lifespan. These were estimated from Figure 5A and reported here.	Fisetin is a senotherapeutic that extends health and lifespan	EBioMedicine. 2018 Oct:36:18-28.
195	35537048		Follistatin gene therapy	Follistatin gene therapy	18	Gene Therapy	Mouse	C57BL/6J	None	Female	9	8	Median	795	1053	258	32%	<0.001	Last mouse	870	1140	270	31%	Not reported		New intranasal and injectable gene therapy for healthy life extension	Proc Natl Acad Sci U S A. 2022 May 17;119(20):e2121499119.
131	28600811		fPAPP-A knockout (inducible)	fPAPP-A knockout (inducible)	5	Genetic	Mouse	Not reported	fPAPP-1 inducible knockout	Female	40	44	Median	760	925	165	22%	<0.005	90th percentile	1025	1105	80	8%	Not reported	Maximum lifespan extension was estimated from Figure 1.	Inducible knockdown of pregnancy-associated plasma protein-A gene expression in adult female mice extends life span	Aging Cell. 2017 Aug;16(4):895-897.
21	11371619		GH reduction via Ghrhr mutation ("lit/lit"; Ghrhr = "growth hormone releasing hormone receptor")	GH reduction via Ghrhr mutation	0	Genetic	Mouse	C57BL/6J-Ghrhrlit/lit	Unclear	Pooled	31	Not reported	Not reported	Not reported	Not reported	Not reported	Not reported	Not reported	Longest-lived	1155	1331	176	15%	0.0001		Lifespan extension and delayed immune and collagen aging in mutant mice with defects in growth hormone production	Proc Natl Acad Sci U S A. 2001 Jun 5;98(12):6736-41.
22	11371619		GH reduction via Ghrhr mutation ("lit/lit"; Ghrhr = "growth hormone releasing hormone receptor")	GH reduction via Ghrhr mutation	0	Genetic	Mouse	C57BL/6J-Ghrhrlit/lit	Unclear	Male	31	Not reported	Median	886	1093	207	23%	0.0001	Not reported	Not reported	Not reported	Not reported	Not reported	Not reported		Lifespan extension and delayed immune and collagen aging in mutant mice with defects in growth hormone production	Proc Natl Acad Sci U S A. 2001 Jun 5;98(12):6736-41.
23	11371619		GH reduction via Ghrhr mutation ("lit/lit"; Ghrhr = "growth hormone releasing hormone receptor")	GH reduction via Ghrhr mutation	0	Genetic	Mouse	C57BL/6J-Ghrhrlit/lit	Unclear	Female	31	Not reported	Median	857	1070	213	25%	0.0001	Not reported	Not reported	Not reported	Not reported	Not reported	Not reported		Lifespan extension and delayed immune and collagen aging in mutant mice with defects in growth hormone production	Proc Natl Acad Sci U S A. 2001 Jun 5;98(12):6736-41.
24	11371619		GH reduction via Pit1 loss-of-function mutation ("dwj/dw")	GH reduction via Pit1 mutation	0	Genetic	Mouse	F1 and C3H/HeJ-Pit1(dw/+) and DW/J-Pit1dw/+	Unclear	Pooled	Not reported	25	Mean	832	1178	346	42%	<0.001	Longest-lived	1060	1451	391	37%	Not reported		Lifespan extension and delayed immune and collagen aging in mutant mice with defects in growth hormone production	Proc Natl Acad Sci U S A. 2001 Jun 5;98(12):6736-41.
96	24175087		Growth hormone releasing hormone knockout (GHRH-KO)	GHRH knockout	0	Multiple	Mouse	C57BL6/129SV	GHRH-KO	Male	56	39	Median	614	928	314	51%	<0.0001	90th percentile	Not reported	Not reported	Not reported	15%	<0.05	These are remarkable percent increases in median lifespan. However, it might be important to note that the control mice are short lived (~630 days) relative to normal C57BL/6 or UM-HET3 mice (~825 days). Important: there seems to be an error about the median female lifespan in the control group. The authors reported 666 days in the text, but a more accurate estimate from the survival curves might…	Growth hormone-releasing hormone disruption extends lifespan and regulates response to caloric restriction in mice	Elife. 2013 Oct 29:2:e01098.
97	24175087		Growth hormone releasing hormone knockout (GHRH-KO)	GHRH knockout	0	Multiple	Mouse	C57BL6/129SV	GHRH-KO	Female	52	58	Median	666	956	290	44%	<0.0001	90th percentile	Not reported	Not reported	Not reported	33%	<0.05	These are remarkable percent increases in median lifespan. However, it might be important to note that the control mice are short lived (~630 days) relative to normal C57BL/6 or UM-HET3 mice (~825 days). Important: there seems to be an error about the median female lifespan in the control group. The authors reported 666 days in the text, but a more accurate estimate from the survival curves might…	Growth hormone-releasing hormone disruption extends lifespan and regulates response to caloric restriction in mice	Elife. 2013 Oct 29:2:e01098.
98	24175087		Growth hormone releasing hormone knockout (GHRH-KO) + 40% calorie restriction	GHRH knockout + 40% calorie restriction	0	Multiple	Mouse	C57BL6/129SV	GHRH-KO	Male	56	42	Median	614	945	331	54%	Not reported	90th percentile	875	1160	285	33%	Not reported	These are remarkable percent increases in median lifespan. However, it might be important to note that the control mice are short lived (~630 days) relative to normal C57BL/6 or UM-HET3 mice (~825 days). Important: there seems to be an error about the median female lifespan in the control group. The authors reported 666 days in the text, but a more accurate estimate from the survival curves might…	Growth hormone-releasing hormone disruption extends lifespan and regulates response to caloric restriction in mice	Elife. 2013 Oct 29:2:e01098.
99	24175087		Growth hormone releasing hormone knockout (GHRH-KO) + 40% calorie restriction	GHRH knockout + 40% calorie restriction	0	Multiple	Mouse	C57BL6/129SV	GHRH-KO	Female	52	60	Median	666	1156	490	74%	Not reported	90th percentile	900	1400	500	56%	Not reported	These are remarkable percent increases in median lifespan. However, it might be important to note that the control mice are short lived (~630 days) relative to normal C57BL/6 or UM-HET3 mice (~825 days). Important: there seems to be an error about the median female lifespan in the control group. The authors reported 666 days in the text, but a more accurate estimate from the survival curves might…	Growth hormone-releasing hormone disruption extends lifespan and regulates response to caloric restriction in mice	Elife. 2013 Oct 29:2:e01098.
153	31003779		GIP knockout	GIP knockout	0	Genetic	Mouse	C57BL/6	GIP(-/-)	Pooled	Not reported	Not reported	Median	806	917	111	14%	0.019	Not reported	951	995	44	5%	Not reported	Only the data available from the "section snippets" on ScienceDirect.com's website was curated here.	Inhibition of GIP signaling extends lifespan without caloric restriction	Biochem Biophys Res Commun. 2019 Jun 11;513(4):974-982.
104	24714520		Glucosamine supplementation	Glucosamine supplementation	23	Dietary	Mouse	C57BL/6NRj	None	Female	37	38	Median	833	903	70	8%	0.007	90th percentile	969.5	1015	45.5	5%	0.007	The specific lifespan data (in days or percentage difference) was not reported for the median or maximum lifespan. These were estimated from the survival curve presented in Figure 3d.	D-Glucosamine supplementation extends life span of nematodes and of ageing mice	Nat Commun. 2014 Apr 8:5:3563.
211	No PMID. See FASEB.	https://faseb.onlinelibrary.wiley.com/doi/abs/10.1096/fasebj.25.1_supplement.528.2	Glycine (8% or 12% in diet)	Glycine (8% or 12% in diet)	1.8	Dietary	Rat	Fischer-344	None	Male	Not reported	Not reported	Median	616	791	175	28%	Not reported	Not reported	637	833	196	31%	Not reported	This appears to have been a conference abstract and may not have a full text available for review (it could not be found). However, there were a considerable number of details in the abstract, so relevant data was extracted from it and reported here.	Dietary glycine supplementation mimics lifespan extension by dietary methionine restriction in Fisher 344 rats	The FASEB Journal. 2011;25(S1):528.2.
151	30916479		Glycine (8% of diet)	Glycine (8% wt of diet)	9	Dietary	Mouse	UM-HET3	None	Male	300	156	Median	832	884	52	6%	0.002	90th percentile	1059	1107	48	5%	0.0005		Glycine supplementation extends lifespan of male and female mice	Aging Cell. 2019 Jun;18(3):e12953.
152	30916479		Glycine (8% of diet)	Glycine (8% wt of diet)	9	Dietary	Mouse	UM-HET3	None	Female	280	136	Median	897	929	32	4%	0.006	No benefit	No benefit	No benefit	No benefit	No benefit	No benefit		Glycine supplementation extends lifespan of male and female mice	Aging Cell. 2019 Jun;18(3):e12953.
188	35268089		Glycine + N-acetylcysteine (dietary)	Glycine + N-acetylcysteine (dietary)	16	Dietary	Mouse	C57BL/6J	None	Pooled	8	8	Median	728	900.2	172.2	24%	<0.0001	90th percentile	840	973	133	16%	Not reported	The maximum lifespan data was not reported in the text, so it was estimated from the survival curve in Figure 1B. This figure illustrates a remarkable increase in lifespan, especially given it was started so late in life.	GlyNAC (Glycine and N-Acetylcysteine) Supplementation in Mice Increases Length of Life by Correcting Glutathione Deficiency, Oxidative Stress, Mitochondrial Dysfunction, Abnormalities in Mitophagy and Nutrient Sensing, and Genomic Damage	Nutrients. 2022 Mar 7;14(5):1114.
27	12933651	https://academic.oup.com/endo/article/144/9/3799/2502152	Growth hormone receptor knockout (GHRKO)	Growth hormone receptor knockout (GHRKO)	0	Genetic	Mouse	Ola-BALB/cJ	GHR/GHBP disruption	Male	15	11	Median	698	888	190	27%	<0.01	%older than 1k days	0%	27%	0.27	n/a	Not reported		Deletion, but not antagonism, of the mouse growth hormone receptor results in severely decreased body weights, insulin, and insulin-like growth factor I levels and increased life span	Endocrinology. 2003 Sep;144(9):3799-810.
28	12933651	https://academic.oup.com/endo/article/144/9/3799/2502152	Growth hormone receptor knockout (GHRKO)	Growth hormone receptor knockout (GHRKO)	0	Genetic	Mouse	Ola-BALB/cJ	GHR/GHBP disruption	Female	24	30	Median	765	981	216	28%	<0.01	%older than 1k days	13%	43%	0.3	n/a	Not reported		Deletion, but not antagonism, of the mouse growth hormone receptor results in severely decreased body weights, insulin, and insulin-like growth factor I levels and increased life span	Endocrinology. 2003 Sep;144(9):3799-810.
202	35952979		Growth hormone receptor knockout in adipocytes	Growth hormone receptor KO in adipocytes	0	Genetic	Mouse	C57BL/6J	GHR-KO (adipocytes)	Male	42	40	Median	891	944	53	6%	0.039	No benefit	No benefit	No benefit	No benefit	No benefit	No benefit	There was no positive effect in females and a very small effect in males. The intervention mice were also fatter.	Disruption of Growth Hormone Receptor in Adipocytes Improves Insulin Sensitivity and Lifespan in Mice	Endocrinology. 2022 Oct 1;163(10):bqac129.
201	35871686		Hesperetin (0.07% in food w/ 3.04% propylene glycol)	Hesperetin (0.07% in food w/ 3.04% propylene glycol)	21.5	Pharmaceutical	Mouse	C57BL/6	CISD2 reporter	Male	8	20	Median	778.5	846	67.5	9%	0.04	Longest-lived	942	1008	66	7%	0.04	It looks like the administration of the vehicle (the group to which they compared the intervention group's outcomes) may have mildly shortened lifespan and reduced function.	Hesperetin promotes longevity and delays aging via activation of Cisd2 in naturally aged mice	J Biomed Sci. 2022 Jul 24;29(1):53.
88	23648059		hMTH1 overexpression	hMTH1 overexpression	0	Genetic	Mouse	C57BL/6	hMTH1 overexpression	Pooled	42	34	Median	790	914	124	16%	Not reported	90th percentile	925	1075	150	16%	Not reported	The 90th percentile (maximum lifespan) data was not reported in the text; it was estimated from the survival curve in Figure 1A.	Prolonged lifespan with enhanced exploratory behavior in mice overexpressing the oxidized nucleoside triphosphatase hMTH1	Aging Cell. 2013 Aug;12(4):695-705.
105	25239873		hNAG-1 transgenic overexpression (mouse line 1377)	hNAG-1 transgenic overexpression	0	Genetic	Mice	Not reported	hNAG-1 overexpression	Female	25	25	Not reported	Not reported	Not reported	Not reported	Not reported	Not reported	40th percentile	563.5	749	185.5	33%	Not reported	The survival curves for the intervention groups look remarkable, but the study was apparently not concluded; 60% of the intervention group mice were still alive, according to the survival curves in figures 1a and 1b.	hNAG-1 increases lifespan by regulating energy metabolism and insulin/IGF-1/mTOR signaling	Aging (Albany NY). 2014 Aug;6(8):690-704.
157	31624261		Hyper-long telomeres	Hyper-long telomeres	0	Genetic	Mouse	C57Bl6	ES cells cultured to elongate telomeres; no genetic manipulation otherwise	Female	24	10	Median	Not reported	Not reported	Not reported	13%	<0.05	Not reported	Not reported	Not reported	Not reported	8%	Not reported	Like many other studies, the number of days in the lifespan of controls and intervention groups were not reported.	Mice with hyper-long telomeres show less metabolic aging and longer lifespans	Nat Commun. 2019 Oct 17;10(1):4723.
156	31309341		Hypercapnic hypoxic exercise, 30 min/day for 21 days; 2 months between sessions	Hypercapnic hypoxic exercise	3	Multiple	Mouse	BALB/c	None	Pooled	18	18	Mean	384	457	73	16%	0.046	Not reported	Not reported	Not reported	Not reported	Not reported	Not reported		Hypercapnic hypoxia as a potential means to extend life expectancy and improve physiological activity in mice	Biogerontology. 2019 Oct;20(5):677-686.
143	29921922		IGF-1 receptor antibody (L2-Cmu)	IGF-1 receptor antibody (L2-Cmu)	18	Antibody	Mouse	C57BL/6J	None	Female	45	45	Median	854	945	91	11%	0.029	No benefit	No benefit	No benefit	No benefit	No benefit	No benefit	The median lifespan data appears to not have reported it in the text except as an illustration in Figure 6d. So, it was estimated from that figure and reported here.	Late-life targeting of the IGF-1 receptor improves healthspan and lifespan in female mice	Nat Commun. 2018 Jun 19;9(1):2394.
26	12543978		Fat-specific insulin receptor knockout (FIRKO)	Insulin receptor knockout (FIRKO)	0	Genetic	Mouse	aP2-Cre	FIRKO	Pooled	20	131	Median	900	1005	105	12%	<0.001	90th percentile	1041	1185	144	14%	<0.001	The authors noted that males and females had similar lifespan extension with this intervention.	Extended longevity in mice lacking the insulin receptor in adipose tissue	Science. 2003 Jan 24;299(5606):572-4.
134	28761067		Intermittent fasting (every-other-day feeding)	Intermittent fasting	2	Dietary	Mouse	C57BL/6J	None	Male	43	37	Mean	806	908	102	13%	0.0017	80th percentile	980	1102	122	12%	0.0017		Every-other-day feeding extends lifespan but fails to delay many symptoms of aging in mice	Nat Commun. 2017 Jul 24;8(1):155.
146	30197301		Intermittent fasting (13 h eating window, ad-libitum)	Intermittent fasting (13 h eating window)	4	Dietary	Mouse	C57BL/6J	None	Male	45	40	Median	725.9	860.3	134.4	19%	<0.001	75th percentile	842.8	944.3	101.5	12%	<0.001	There appears to have been a benefit to maximum lifespan in the CR group and not the limited eating window group, but these were apparently not reported in the text.	Daily Fasting Improves Health and Survival in Male Mice Independent of Diet Composition and Calories	Cell Metab. 2019 Jan 8;29(1):221-228.e3.
76	22265987		Intermittent fasting (24-hour)	Intermittent fasting (24-hour)	4.5	Dietary	Mouse	C57BL/6	None	Male	12	68	Median	690	945	255	37%	<0.001	90th percentile	840	1050	210	25%	Not reported	Both intervention groups appeared to have a clear benefit to maximum lifespan (90th percentile), but this was not reported in the full text, so they were estimated from the survival curves and reported here.	Potentiation of dietary restriction-induced lifespan extension by polyphenols	Biochim Biophys Acta. 2012 Apr;1822(4):522-6.
77	22265987		Intermittent fasting (24-hour) + polyphenols	Intermittent fasting (24-hour) + polyphenols	4.5	Dietary	Mouse	C57BL/6	None	Male	12	68	Median	690	1005	315	46%	<0.001	90th percentile	840	1080	240	29%	Not reported	Both intervention groups appeared to have a clear benefit to maximum lifespan (90th percentile), but this was not reported in the full text, so they were estimated from the survival curves and reported here.	Potentiation of dietary restriction-induced lifespan extension by polyphenols	Biochim Biophys Acta. 2012 Apr;1822(4):522-6.
45	17928362		Irs1 (insulin receptor substrate 1) knockout	Irs1 knockout	0	Genetic	Mouse	C57BL/6	Irs1-KO	Female	21	14	Median	738	971	233	32%	<0.001	Not reported	Not reported	Not reported	Not reported	Not reported	Not reported	It is noteworthy how knockout of Irs2 had such a strong *negative* effect on lifespan, particularly in the males (see Figure 1 C and D).	Evidence for lifespan extension and delayed age-related biomarkers in insulin receptor substrate 1 null mice	FASEB J. 2008 Mar;22(3):807-18.
72	21283571		Irs1 (insulin receptor substrate 1) knockout	Irs1 knockout	0	Genetic	Mouse	C57BL/6	Irs1 knockout	Female	37	29	Median	760	922	162	21%	<0.0001	90th percentile	973	1187	214	22%	<0.05		Replication of extended lifespan phenotype in mice with deletion of insulin receptor substrate 1	PLoS One. 2011 Jan 25;6(1):e16144.
73	21283571		Irs1 (insulin receptor substrate 1) knockout	Irs1 knockout	0	Genetic	Mouse	C57BL/6	Irs1 knockout	Male	37	12	Median	775	896	121	16%	<0.05	90th percentile	Not reported	Not reported	Not reported	Not reported	Not reported	There may have been a benefit to maximum lifespan in the male mice, but this was not reported in the text and it looked questionable on the survival curve (considering there were only 12 mice in the intervention group), so it was not reported here.	Replication of extended lifespan phenotype in mice with deletion of insulin receptor substrate 1	PLoS One. 2011 Jan 25;6(1):e16144.
135	28877457		Ketogenic diet	Ketogenic diet	12	Dietary	Mouse	C57BL/6	None	Male	43	43	Median	886	1003	117	13%	Not reported	No benefit	No benefit	No benefit	No benefit	No benefit	No benefit	This study was done only in male mice.	A Ketogenic Diet Extends Longevity and Healthspan in Adult Mice	Cell Metab. 2017 Sep 5;26(3):539-546.e5.
40	17525257		Low-AGE diet	Low-AGE diet	4	Dietary	Mouse	C57BL/6	None	Male	22	22	Median	756	847	91	12%	<0.001	90th percentile	840	903	63	8%	<0.001		Reduced oxidant stress and extended lifespan in mice exposed to a low glycotoxin diet: association with increased AGER1 expression	Am J Pathol. 2007 Jun;170(6):1893-902.
100	24472560		Low-glycemic diet in late life	Low-glycemic diet in late life	20	Dietary	Mouse	Balb/c	None	Female	32	32	Mean	Not reported	Not reported	Not reported	12%	<0.0001	Not reported	Not reported	Not reported	Not reported	Not reported	Not reported	The 90th percentile data was not reported in the text and the benefit at this point in life appeared to be questionable according to the survival curve, so it was not reported here.	Consumption of a low glycaemic index diet in late life extends lifespan of Balb/c mice with differential effects on DNA damage	Longev Healthspan. 2013 Mar 1;2(1):4.
16	8290600	https://www.ncbi.nlm.nih.gov/pmc/articles/PMC43034/pdf/pnas01533-0367.pdf	Melatonin in drinking water (10 ug/mL + 0.01% ethanol) at night	Melatonin in drinking water	15	Pharmaceutical	Mouse	BALB/c	None	Female	26	12	Median	714	843	129	18%	<0.001	90th percentile	810	922.5	112.5	14%	Not reported	90th-percentile lifespan was not reported in the text, so it was estimated from Figure 1 reported here.	Pineal control of aging: effect of melatonin and pineal grafting on aging mice	Proc Natl Acad Sci U S A. 1994 Jan 18;91(2):787-91.
17	8290600	https://www.ncbi.nlm.nih.gov/pmc/articles/PMC43034/pdf/pnas01533-0367.pdf	Melatonin in drinking water (10 ug/mL + 0.01% ethanol) at night	Melatonin in drinking water	19	Pharmaceutical	Mouse	C57BL/6	None	Male	20	15	Not reported	743	871	128	17%	Not reported	Not reported	Not reported	Not reported	Not reported	Not reported	Not reported		Pineal control of aging: effect of melatonin and pineal grafting on aging mice	Proc Natl Acad Sci U S A. 1994 Jan 18;91(2):787-91.
89	23900241		Metformin (0.1% in chow)	Metformin (0.1% in chow)	6	Pharmaceutical	Mouse	C57BL6	None	Male	83	64	Mean	Not reported	Not reported	Not reported	6%	0.02	Not reported	Not reported	Not reported	Not reported	Not reported	Not reported	An extension of *mean* lifespan is apparently the only result that could be considered statistically significant for lifespan, with a p-value of only 0.02 and a percentage increase of only 6%. The effect might not have been large enough to show a statistically significant effect for median or maximum lifespan, so I suspect the authors had to use the more inclusive mean figures to achieve statisti…	Metformin improves healthspan and lifespan in mice	Nat Commun. 2013:4:2192.
90	23900241		Metformin (0.1% in chow)	Metformin (0.1% in chow)	6	Pharmaceutical	Mouse	B6C3F1	None	Male	83	64	Mean	Not reported	Not reported	Not reported	4%	0.064	Not reported	Not reported	Not reported	Not reported	Not reported	Not reported	This result had a p-value that was arguably too high to be considered statistically significant. I left it here to show what mediocre results can be sensationalized in the study title and reported in Nature communications.	Metformin improves healthspan and lifespan in mice	Nat Commun. 2013:4:2192.
91	23900241		Metformin (1.0% in chow)	Metformin (1.0% in chow)	11	Pharmaceutical	Mouse	C57BL6	None	Male	88	90	Mean	Not reported	Not reported	Not reported	-14%	<0.001	Not reported	Not reported	Not reported	Not reported	Not reported	Not reported	This was the most statistically significant result they found for lifespan: a noteworthy *shortening* of lifespan with 1% metformin.	Metformin improves healthspan and lifespan in mice	Nat Commun. 2013:4:2192.
50	18728386		Metformin (100 mg/kg in drinking water)	Metformin (100 mg/kg in drinking water)	3	Pharmaceutical	Mouse	SHR	Unknown	Female	50	50	Median	297	570	273	92%	<0.05	90th percentile	727	878	151	21%	<0.05	The *percentage* extension of median lifespan looks amazing, but note how the control group is so short lived compared to the usually used C57BL/6 or UM-HET3 strain (297 days vs. ~800 days). Even the maximum lifespan is relatively short (727 days vs. 1,000+ days). It appears as though metformin is significantly treating whatever is causing these animals to die so early in life.	Metformin slows down aging and extends life span of female SHR mice	Cell Cycle. 2008 Sep 1;7(17):2769-73.
62	20304770		Metformin (300 mg/kg/day)	Metformin (300 mg/kg/day)	6	Pharmaceutical	Rat	Fischer-344	None	Male	31	40	Mean	796	814	18	2%	Not significant	No benefit	No benefit	No benefit	No benefit	No benefit	No benefit	These figures were reported even though they were not significant because we want RAID viewers to see how unreliable metformin has been at extending lifespan in rodents. Moreover, there appear to be three interesting lessons to consider from this study: (1) that metformin, yet again, failed to extend maximum lifespan, (2) that CR extended median and mean lifespan, but did not lengthen the maximum…	Metformin supplementation and life span in Fischer-344 rats	J Gerontol A Biol Sci Med Sci. 2010 May;65(5):468-74.
25	12543260		Methionine restriction (0.17% food weight)	Methionine restriction	1.5	Dietary	Rats	Fischer-344	None	Male	Not reported	Not reported	Median	784	1071	287	37%	Not reported	90th percentile	1036	1253	217	21%	Not reported		Nutritional control of aging	Exp Gerontol. 2003 Jan-Feb;38(1-2):47-52.
33	15924568	https://www.ncbi.nlm.nih.gov/pmc/articles/PMC7159399/	Methionine restriction (0.15% food weight)	Methionine restriction	1.5	Dietary	Mouse	CB6F1	None	Female	40	40	Median	920	1050	130	14%	<0.0002	90th percentile	1144	1261	117	10%	<0.0002	The median lifespan data was not reported in the text, so it was estimated from the survival curve in Figure 1.	Methionine-deficient diet extends mouse lifespan, slows immune and lens aging, alters glucose, T4, IGF-I and insulin levels, and increases hepatocyte MIF levels and stress resistance	Aging Cell. 2005 Jun;4(3):119-25.
56	19414512		Methionine restriction (0.15% food weight)	Methionine restriction (0.15% food weight)	12.5	Dietary	Mouse	BALB/c × C57BL/6 (CB6F1)	None	Male	51	51	Median	948	1011	63	7%	0.02	90th percentile	1120	1205	85	8%	Not reported	The 90th percentile was estimated from the survival curve in Figure 1. The Wang-Allison test was 19% vs. 2% with a p-value of 0.01.	Life-span extension in mice by preweaning food restriction and by methionine restriction in middle age	J Gerontol A Biol Sci Med Sci. 2009 Jul;64(7):711-22.
86	23314750		Metoprolol (beta-blocker)	Metoprolol (beta-blocker)	12	Pharmaceutical	Mouse	C3B6F1	None	Male	Not reported	36	Median	983	1080	97	10%	0.016	No benefit	No benefit	No benefit	No benefit	No benefit	No benefit		β1-Adrenergic receptor blockade extends the life span of Drosophila and long-lived mice	Age (Dordr). 2013 Dec;35(6):2099-109.
184	34781166		miRNA-455-3p overexpression	miRNA-455-3p overexpression	0	Genetic	Mouse	C57BL/6	miRNA-455-3p overexpression (transgenic)	Pooled	20	20	Median	750	870	120	16%	0.038	Not reported	Not reported	Not reported	Not reported	Not reported	Not reported	There appears to be a benefit to maximum lifespan based on Figure 1A, but it appears to not have been reported in the text.	MicroRNA-455-3p improves synaptic, cognitive functions and extends lifespan: Relevance to Alzheimer's disease	Redox Biol. 2021 Nov 9:48:102182.
173	33473109		MOTS-c IP injection (3x/week)	MOTS-c IP injection (3x/week)	24	Pharmaceutical	Mouse	C57BL/6N	None	Male	19	18	Median	912	970	58	6%	0.05	Not reported	1047	1120	73	7%	Not reported	The definition and p-value for the maximum lifespan data was not clear from the text or figures.	MOTS-c is an exercise-induced mitochondrial-encoded regulator of age-dependent physical decline and muscle homeostasis	Nat Commun. 2021 Jan 20;12(1):470.
182	34439857		Mouse serum albumin, recombinant ("rMSA"), 1.5 mg/g body weight every 3 weeks	Mouse serum albumin, recombinant	12	Pharmaceutical	Mouse	C57BL/6	None	Male	19	19	Median	576	693	117	20%	0.0342	90th percentile	735	810	75	10%	Not reported		Young and Undamaged rMSA Improves the Healthspan and Lifespan of Mice	Biomolecules. 2021 Aug 12;11(8):1191.
183	34439857		Mouse serum albumin, recombinant ("rMSA"), 1.5 mg/g body weight every 3 weeks	Mouse serum albumin, recombinant	12	Pharmaceutical	Mouse	C57BL/6	None	Female	31	32	Median	579	681	102	18%	0.0164	90th percentile	690	750	60	9%	Not reported		Young and Undamaged rMSA Improves the Healthspan and Lifespan of Mice	Biomolecules. 2021 Aug 12;11(8):1191.
111	26315571		MSC transplantation (from human amniotic membrane MSCs)	MSC transplantation	10	Cellular	Rat	Fischer-344	None	Male	20	20	Mean	605	746	141	31%	<0.05	90th percentile	636	870	234	37%	<0.05	The lifespan extension reported in this study seems remarkable from the survival curves, though the mean lifespan of the control group seems low (at least, relative to C57LB/6 mice; perhaps this is normal for these rats).	Health Span-Extending Activity of Human Amniotic Membrane- and Adipose Tissue-Derived Stem Cells in F344 Rats	Stem Cells Transl Med. 2015 Oct;4(10):1144-54.
110	26315571		MSC transplantation (from human adipose-derived MSCs)	MSC transplantation	10	Cellular	Rat	Fischer-344	None	Male	20	30	Mean	605	793.8	188.8	31%	<0.05	90th percentile	636	900	264	42%	<0.05	The lifespan extension reported in this study seems remarkable from the survival curves, though the mean lifespan of the control group seems low (at least, relative to C57LB/6 mice; perhaps this is normal for these rats).	Health Span-Extending Activity of Human Amniotic Membrane- and Adipose Tissue-Derived Stem Cells in F344 Rats	Stem Cells Transl Med. 2015 Oct;4(10):1144-54.
107	25619689		Myc haploinsufficiency (Myc(-/+))	Myc haploinsufficiency (Myc(-/+))	0	Genetic	Mouse	C57BL/6	Myc haploinsufficiency	Male	42	42	Median	881	975	94	11%	<0.0001	Not reported	Not reported	Not reported	Not reported	Not reported	Not reported	There may have been a benefit to maximum lifespan as well, but it does not appear to have been reported explicitly in the text.	Reduced expression of MYC increases longevity and enhances healthspan	Cell. 2015 Jan 29;160(3):477-88.
108	25619689		Myc haploinsufficiency (Myc(-/+))	Myc haploinsufficiency (Myc(-/+))	0	Genetic	Mouse	C57BL/6	Myc haploinsufficiency	Female	37	39	Median	810	979	169	21%	0.0006	Not reported	Not reported	Not reported	Not reported	Not reported	Not reported	There may have been a benefit to maximum lifespan as well, but it does not appear to have been reported explicitly in the text.	Reduced expression of MYC increases longevity and enhances healthspan	Cell. 2015 Jan 29;160(3):477-88.
67	20819793		N-acetylcysteine (1,200 mg/kg/day via 10 g/L in drinking water)	N-acetylcysteine (10 g/L in drinking water)	7	Dietary	Mouse	UM-HET3	None	Male	16	16	Median	790	995	205	26%	Not reported	90th percentile	905	1310	405	45%	Not reported		Life extension by diet restriction and N-acetyl-L-cysteine in genetically heterogeneous mice	J Gerontol A Biol Sci Med Sci. 2010 Dec;65(12):1275-84.
68	20819793		N-acetylcysteine (600 mg/kg/day via 5 g/L in drinking water)	N-acetylcysteine (5 g/L in drinking water)	7	Dietary	Mouse	UM-HET3	None	Male	16	16	Median	790	930	140	18%	Not reported	90th percentile	905	1305	400	44%	Not reported	The median and maximum lifespan was not reported in number of days (only in a survival curve). So, the data reported here was estimated from the survival curve in in Figure 3B.	Life extension by diet restriction and N-acetyl-L-cysteine in genetically heterogeneous mice	J Gerontol A Biol Sci Med Sci. 2010 Dec;65(12):1275-84.
155	31204283		Nampt knock-in (adipose-tissue specific)	Nampt knock-in (adipose-tissue specific)	0	Genetic	Mouse	C57BL/6J	None	Female	39	40	Median	693	786	93	13%	0.014	No benefit	No benefit	No benefit	No benefit	No benefit	No benefit	This positive effect was only seen for median lifespan and even then, only in females.	Extracellular Vesicle-Contained eNAMPT Delays Aging and Extends Lifespan in Mice	Cell Metab. 2019 Aug 6;30(2):329-342.e5.
87	23314750		Nebivolol	Nebivolol	12	Pharmaceutical	Mouse	C3B6F1	None	Male	Not reported	36	Median	983	1046	63	6%	0.023	No benefit	No benefit	No benefit	No benefit	No benefit	No benefit		β1-Adrenergic receptor blockade extends the life span of Drosophila and long-lived mice	Age (Dordr). 2013 Dec;35(6):2099-109.
116	27127236		Nicotinamide riboside in chow	Nicotinamide riboside in chow	24	Pharmaceutical	Mouse	C57BL/6J	None	Not reported	30	30	Median	829	868	39	5%	0.034	Not reported	Not reported	Not reported	Not reported	Not reported	Not reported		NAD⁺ repletion improves mitochondrial and stem cell function and enhances life span in mice	Science. 2016 Jun 17;352(6292):1436-43.
49	18631321		Nordihydroguaiaretic acid (NDGA), 2.5 g/kg of food	Nordihydroguaiaretic acid (NDGA)	9	Pharmaceutical	Mouse	UM-HET3	None	Male	Not reported	Not reported	Median	786	881	95	12%	0.0006	No benefit	No benefit	No benefit	No benefit	No benefit	No benefit	These results are unusual in that most of the positive effect for NDGA was found at UT, and for reasons unknown, UM male control mice lived significantly longer than control mice at the other two sites. When pooled across sites, a statistically significant positive effect on median lifespan was observed in males for both NDGA and aspirin. No positive effect was observed for females for either int…	Nordihydroguaiaretic acid and aspirin increase lifespan of genetically heterogeneous male mice	Aging Cell. 2008 Oct;7(5):641-50.
106	25380600		Nordihydroguaiaretic Acid (NDGA), 3.5 g/kg in food	Nordihydroguaiaretic Acid (NDGA)	12	Pharmaceutical	Mouse	B6C3F1	None	Male	22	20	Median	Not reported	Not reported	Not reported	12%	0.008	No benefit	No benefit	No benefit	No benefit	No benefit	No benefit	Other doses tested appeared to have little or no effect (the positive effect on median lifespan was dependent on a specific dose).	Nordihydroguaiaretic Acid Extends the Lifespan of Drosophila and Mice, Increases Mortality-Related Tumors and Hemorrhagic Diathesis, and Alters Energy Homeostasis in Mice	J Gerontol A Biol Sci Med Sci. 2015 Dec;70(12):1479-89.
120	27312235		Nordihydroguaiaretic acid (NDGA), 5,000 ppm in food	Nordihydroguaiaretic acid (NDGA)	6	Pharmaceutical	Mouse	UM-HET3	None	Male	274	137	Median	780	839	59	8%	0.003	No benefit	No benefit	No benefit	No benefit	No benefit	No benefit		Longer lifespan in male mice treated with a weakly estrogenic agonist, an antioxidant, an α-glucosidase inhibitor or a Nrf2-inducer	Aging Cell. 2016 Oct;15(5):872-84.
162	32164269		NoxO1 knockout (-/-)	NoxO1 knockout (-/-)	0	Genetic	Mouse	C57/BL6	NoxO1(-/-)	Male	10	10	Not reported	Not reported	Not reported	Not reported	Not reported	Not reported	90th percentile	800	1100	300	38%	<0.05	For whatever reasons, like many other groups, these authors did not report the statistical data (days lived, p value) about maximum lifespan extension. Median lifespan might not have been extended but maximum lifespan appears significantly longer. The data for maximum lifespan extension was estimated from the survival curve in Figure 1A and reported here.	NoxO1 Knockout Promotes Longevity in Mice	Antioxidants (Basel). 2020 Mar 10;9(3):226.
79	22498298		Olive oil (1 mL daily for 1 week, weekly for 1 month, bi-monthly for 5 months). Stopped at month 17 (7 months after starting administration).	Olive oil vehicle for C60 fullerene (see notes)	10	Dietary	Rats	Wistar	None	Male	6	6	Median	960	1290	330	34%	see note	Last rat (1/6)	1110	1710	600	54%	see note	The lifespan extension of the C60 fullerene administration group is remarkable, yet there were only 6 rats in each group and the p-values are not clear from the text. The authors wrote: "The log-rank test leads to c2 values (one degree of freedom) of 7.009, 11.302, and 10.454, when we compare water-treated and olive oil-treated rats, water-treated and C60-treated rats, and olive oil-treated and C…	The prolongation of the lifespan of rats by repeated oral administration of [60]fullerene	Biomaterials. 2012 Jun;33(19):4936-46.
198	35662728		Oridonin (2 mg/kg for 1 week per month for 6 months)	Oridonin (2 mg/kg for 1 week per month for 6 months)	16	Pharmaceutical	Mouse	C57BL/6J	None	Male	19	10	Mean	394	479	85	11%	Not reported	Not reported	Not reported	Not reported	Not reported	Not reported	Not reported	This extension of average lifespan appears to only take place during oridonin administration. Survival appears similar to controls once oridonin administration was stopped.	Oridonin Delays Aging Through the AKT Signaling Pathway	Front Pharmacol. 2022 May 18:13:888247.
42	17681037		PAPP-A (pregnancy-associated plasma protein A) knockout	PAPP-A knockout	0	Genetic	Mouse	C57BL/6:129SV/E	PAPP-A-KO	Pooled	17	20	Mean	698	960	262	38%	<0.0001	90th percentile	872	1166	294	34%	Not reported	The data reported in this study was very limited, but the lifespan extension effect was remarkable (approximately 30-40% extension in both mean and maximum lifespan for both males and females). The data on the weight of the animals might also have been interesting to see.	Loss of pregnancy-associated plasma protein A extends lifespan in mice	Aging Cell. 2007 Oct;6(5):727-9.
43	17681037		PAPP-A (pregnancy-associated plasma protein A) knockout	PAPP-A knockout	0	Genetic	Mouse	C57BL/6:129SV/E	PAPP-A-KO	Male	Not reported	Not reported	Mean	Not reported	Not reported	Not reported	33%	Not reported	Not reported	Not reported	Not reported	Not reported	Not reported	Not reported	The data reported in this study was very limited, but the lifespan extension effect was remarkable (approximately 30-40% extension in both mean and maximum lifespan for both males and females). The data on the weight of the animals might also have been interesting to see.	Loss of pregnancy-associated plasma protein A extends lifespan in mice	Aging Cell. 2007 Oct;6(5):727-9.
44	17681037		PAPP-A (pregnancy-associated plasma protein A) knockout	PAPP-A knockout	0	Genetic	Mouse	C57BL/6:129SV/E	PAPP-A-KO	Female	Not reported	Not reported	Mean	Not reported	Not reported	Not reported	41%	Not reported	Not reported	Not reported	Not reported	Not reported	Not reported	Not reported	The data reported in this study was very limited, but the lifespan extension effect was remarkable (approximately 30-40% extension in both mean and maximum lifespan for both males and females). The data on the weight of the animals might also have been interesting to see.	Loss of pregnancy-associated plasma protein A extends lifespan in mice	Aging Cell. 2007 Oct;6(5):727-9.
185	34873338		PCC1 (senolytic) biweekly for 4 months	PCC1 (senolytic) biweekly for 4 months	20	Pharmaceutical	Mouse	C57BL/6J	None	Pooled	80	91	Median	723	802	79	11%	<0.0001	90th percentile	910	970	60	7%	Not reported	The increase in maximum lifespan was apparently not reported in the text, but it was evident in Figures 8l and 8m. The maximum lifespan values reported here were estimated from the survival curves in Figures 8l and 8m.	The flavonoid procyanidin C1 has senotherapeutic activity and increases lifespan in mice	Nat Metab. 2021 Dec;3(12):1706-1726.
34	16643985		Pituitary gland removal	Pituitary gland removal	1	Surgical	Mouse	Not reported	Unknown	Male	70	39	Mean	848	971	123	15%	0.002	80th percentile	1047	1162	115	11%	0.001		Pituitary removal in adult mice increases life span	Mech Ageing Dev. 2006 Aug;127(8):658-9.
35	16643985		Pituitary gland removal	Pituitary gland removal	9	Surgical	Mouse	Not reported	Unknown	Male	70	13	Mean	848	1030	182	21%	0.002	80th percentile	1047	1175	128	12%	0.005		Pituitary removal in adult mice increases life span	Mech Ageing Dev. 2006 Aug;127(8):658-9.
212	8900272	https://www.nature.com/articles/384033a0.pdf	Primary pituitary deficiency (Ames dwarf mice)	Primary pituitary deficiency (Ames dwarf mice)	0	Genetic	Mouse	Ames dwarf (df/df)	Unreported	Male	15	17	Median	625	1050	425	68%	<0.0001	90th percentile	860	1310	450	52%	<0.0001	This study reported exact figures for mean lifespan, but instead of reporting those here, median lifespan was estimated from the survival curves and reported here.	Dwarf mice and the ageing process	Nature. 1996 Nov 7;384(6604):33.
213	8900272	https://www.nature.com/articles/384033a0.pdf	Primary pituitary deficiency (Ames dwarf mice)	Primary pituitary deficiency (Ames dwarf mice)	0	Genetic	Mouse	Ames dwarf (df/df)	Unreported	Female	13	17	Median	575	1200	625	109%	<0.0001	90th percentile	780	1250	470	60%	<0.0001	This study reported exact figures for mean lifespan, but instead of reporting those here, median lifespan was estimated from the survival curves and reported here.	Dwarf mice and the ageing process	Nature. 1996 Nov 7;384(6604):33.
121	27312235		Protandim (600-1,200 ppm)	Protandim (600-1,200 ppm)	10	Pharmaceutical	Mouse	UM-HET3	None	Male	294	155	Median	780	834	54	7%	0.012	No benefit	No benefit	No benefit	No benefit	No benefit	No benefit		Longer lifespan in male mice treated with a weakly estrogenic agonist, an antioxidant, an α-glucosidase inhibitor or a Nrf2-inducer	Aging Cell. 2016 Oct;15(5):872-84.
189	35393401		Protein restriction (5% of calories)	Protein restriction (5% of calories)	3	Dietary	Mouse	C57BL/6J	None	Male	60	60	Median	750	870	120	16%	0.01365	Not reported	Not reported	Not reported	Not reported	Not reported	Not reported	There might have been an increase in maximum lifespan, but the authors did not provide sufficient data to be able to report it here.	FGF21 is required for protein restriction to extend lifespan and improve metabolic health in male mice	Nat Commun. 2022 Apr 7;13(1):1897.
124	27549339		Rapamycin (126 ppm in food) for 3 months	Rapamycin (126 ppm in food) for 3 months	20	Pharmaceutical	Mouse	C57BL/6JNia	None	Male	20	19	Median	914	1037	123	13%	Not reported	Not reported	Not reported	Not reported	Not reported	Not reported	Not reported	Median lifespan of males was extended by rapamycin both via injection and food, where median *female* lifespan was only extended via rapamycin in food.	Transient rapamycin treatment can increase lifespan and healthspan in middle-aged mice	Elife. 2016 Aug 23:5:e16351.
206	36179270		Rapamycin (14 ppm in food) + Acarbose	Rapamycin (14 ppm in food) + Acarbose	9	Pharmaceutical	Mouse	UM-HET3	None	Male	285	153	Median	718	981	263	37%	0.001	90th percentile	1029	1272	243	19%	0.001	There was some considerable variation between test sites in results.	Lifespan benefits for the combination of rapamycin plus acarbose and for captopril in genetically heterogeneous mice	Aging Cell. 2022 Dec;21(12):e13724.
207	36179270		Rapamycin (14 ppm in food) + Acarbose	Rapamycin (14 ppm in food) + Acarbose	16	Pharmaceutical	Mouse	UM-HET3	None	Male	285	138	Median	718	815	97	14%	0.001	90th percentile	1029	1217	188	15%	0.001	There was some considerable variation between test sites in results.	Lifespan benefits for the combination of rapamycin plus acarbose and for captopril in genetically heterogeneous mice	Aging Cell. 2022 Dec;21(12):e13724.
208	36179270		Rapamycin (14 ppm in food) + Acarbose	Rapamycin (14 ppm in food) + Acarbose	9	Pharmaceutical	Mouse	UM-HET3	None	Female	276	134	Median	868	1107	239	28%	0.001	90th percentile	1060	1278	218	21%	0.001	There was some considerable variation between test sites in results.	Lifespan benefits for the combination of rapamycin plus acarbose and for captopril in genetically heterogeneous mice	Aging Cell. 2022 Dec;21(12):e13724.
209	36179270		Rapamycin (14 ppm in food) + Acarbose	Rapamycin (14 ppm in food) + Acarbose	16	Pharmaceutical	Mouse	UM-HET3	None	Female	276	134	Median	868	976	108	12%	0.001	90th percentile	1060	1223	163	15%	0.001	There was some considerable variation between test sites in results.	Lifespan benefits for the combination of rapamycin plus acarbose and for captopril in genetically heterogeneous mice	Aging Cell. 2022 Dec;21(12):e13724.
122	27312235		Rapamycin (14 ppm in food) + Metformin (1000 ppm in food)	Rapamycin (14 ppm) + Metformin (1000 ppm)	9	Pharmaceutical	Mouse	UM-HET3	None	Male	294	158	Median	780	959	179	23%	<0.001	90th percentile	1064	1175	111	10%	<0.001		Longer lifespan in male mice treated with a weakly estrogenic agonist, an antioxidant, an α-glucosidase inhibitor or a Nrf2-inducer	Aging Cell. 2016 Oct;15(5):872-84.
123	27312235		Rapamycin (14 ppm in food) + Metformin (1000 ppm in food)	Rapamycin (14 ppm) + Metformin (1000 ppm)	9	Pharmaceutical	Mouse	UM-HET3	None	Female	281	142	Median	874	1078	204	23%	<0.001	90th percentile	1092	1278	186	17%	<0.001		Longer lifespan in male mice treated with a weakly estrogenic agonist, an antioxidant, an α-glucosidase inhibitor or a Nrf2-inducer	Aging Cell. 2016 Oct;15(5):872-84.
160	32127537		Rapamycin (42 ppm in food)	Rapamycin (42 ppm in food)	3	Pharmaceutical	Mouse	C57BL/6	None	Male	13	13	Median	525	750	225	43%	0.013	90th percentile	712.5	885	172.5	24%	Not reported	For whatever reasons, like many other groups, these authors did not report detailed statistical data for maximum lifespan of the unpooled (sex-specific) data. This data was estimated from the survival curves in the supplementary data 1C.	The mTOR pathway is necessary for survival of mice with short telomeres	Nat Commun. 2020 Mar 3;11(1):1168.
161	32127537		Rapamycin (42 ppm in food)	Rapamycin (42 ppm in food)	3	Pharmaceutical	Mouse	C57BL/6	None	Female	10	13	Median	720	900	180	25%	0.015	90th percentile	870	960	90	10%	Not reported	For whatever reasons, like many other groups, these authors did not report detailed statistical data for maximum lifespan of the unpooled (sex-specific) data. This data was estimated from the survival curves in the supplementary data 1A.	The mTOR pathway is necessary for survival of mice with short telomeres	Nat Commun. 2020 Mar 3;11(1):1168.
168	33145977		Rapamycin (42 ppm in food)	Rapamycin (42 ppm in food)	20	Pharmaceutical	Mouse	UM-HET3	None	Male	300	156	Median	772	856	84	11%	0.0007	90th percentile	1049	1148	99	9%	0.04		Rapamycin-mediated mouse lifespan extension: Late-life dosage regimes with sex-specific effects	Aging Cell. 2020 Nov;19(11):e13269.
169	33145977		Rapamycin (42 ppm in food)	Rapamycin (42 ppm in food)	20	Pharmaceutical	Mouse	UM-HET3	None	Female	280	136	Median	905	1040	135	15%	<0.0001	90th percentile	1095	1231	136	12%	<0.0001		Rapamycin-mediated mouse lifespan extension: Late-life dosage regimes with sex-specific effects	Aging Cell. 2020 Nov;19(11):e13269.
203	36112674		Rapamycin (for postnatal days 0-45)	Rapamycin (for postnatal days 0-45)	0	Pharmaceutical	Mouse	UM-HET3 (C3D2F1/J)	None	Male	35	30	Median	Not reported	Not reported	Not reported	12%	0.0064	Not reported	Not reported	Not reported	Not reported	Not reported	Not reported	Median lifespan extension was reported in text but only presented on graphs (could not determine lifespan in the units of "number of days"). Also, no effect was found in females.	Rapamycin treatment during development extends life span and health span of male mice and Daphnia magna	Sci Adv. 2022 Sep 16;8(37):eabo5482.
199	35796299		Rapamycin (for postnatal days 4-30)	Rapamycin (for postnatal days 4-30)	0	Pharmaceutical	Mouse	CD1	None	Male	48	48	Median	655	713.5	58.5	9%	Not reported	Not reported	Not reported	Not reported	Not reported	Not reported	Not reported		Transient rapamycin treatment during developmental stage extends lifespan in Mus musculus and Drosophila melanogaster	EMBO Rep. 2022 Sep 5;23(9):e55299.
200	35796299		Rapamycin (for postnatal days 4-30)	Rapamycin (for postnatal days 4-30)	0	Pharmaceutical	Mouse	CD1	None	Female	50	54	Median	714	774	60	8%	Not reported	Not reported	Not reported	Not reported	Not reported	Not reported	Not reported		Transient rapamycin treatment during developmental stage extends lifespan in Mus musculus and Drosophila melanogaster	EMBO Rep. 2022 Sep 5;23(9):e55299.
170	33145977		Rapamycin (monthly cycles; 42 ppm in food)	Rapamycin (monthly cycles; 42 ppm in food)	20	Pharmaceutical	Mouse	UM-HET3	None	Male	300	159	Median	772	841	69	9%	0.002	90th percentile	1049	1144	95	9%	0.001		Rapamycin-mediated mouse lifespan extension: Late-life dosage regimes with sex-specific effects	Aging Cell. 2020 Nov;19(11):e13269.
171	33145977		Rapamycin (monthly cycles; 42 ppm in food)	Rapamycin (monthly cycles; 42 ppm in food)	20	Pharmaceutical	Mouse	UM-HET3	None	Female	280	136	Median	905	977	72	8%	<0.0001	90th percentile	1095	1203	108	10%	0.0004		Rapamycin-mediated mouse lifespan extension: Late-life dosage regimes with sex-specific effects	Aging Cell. 2020 Nov;19(11):e13269.
58	19587680		Rapamycin (14 mg/kg in food)	Rapamycin (via 14 mg/kg in food)	20	Pharmaceutical	Mouse	Pathogen-free CB6F1/C3D2F1 cross	None	Male	21	34	Median	800	975	175	22%	<0.0001	90th percentile	1078	1179	101	9%	<0.0001	There is reason to doubt the male lifespan data: the rapamycin group began living longer *before* they were given rapamycin (see Figure 1, left panel). The female data does not have this apparent flaw. Also: the median lifespan data was not reported in the text, so it was estimated from the survival curves in figure 1.	Rapamycin fed late in life extends lifespan in genetically heterogeneous mice	Nature. 2009 Jul 16;460(7253):392-5.
59	19587680		Rapamycin (14 mg/kg in food)	Rapamycin (via 14 mg/kg in food)	20	Pharmaceutical	Mouse	Pathogen-free CB6F1/C3D2F1 cross	None	Female	14	31	Median	910	1010	100	11%	<0.0001	90th percentile	1094	1245	151	14%	<0.0001	There is reason to doubt the male lifespan data: the rapamycin group began living longer *before* they were given rapamycin (see Figure 1, left panel). The female data does not have this apparent flaw. Also: the median lifespan data was not reported in the text, so it was estimated from the survival curves in figure 1.	Rapamycin fed late in life extends lifespan in genetically heterogeneous mice	Nature. 2009 Jul 16;460(7253):392-5.
70	20974732		Rapamycin (14 mg/kg in food)	Rapamycin (via 14 mg/kg in food)	9	Pharmaceutical	Mouse	UM-HET3	None	Male	50	50	Median	851	932	81	10%	<0.05	90th percentile	1061	1211	150	14%	<0.05	There were three test sites, but the authors apparently did not reported statistical data (days lived) for the *pooled* site data. Here, data was reported for the site with intermediate results (not the highest or lowest), which was the University of Michigan (UM). Furthermore, one might reasonably doubt the male and female 90th percentile lifespan data, which was reported as exactly the same for…	Rapamycin, but not resveratrol or simvastatin, extends life span of genetically heterogeneous mice	J Gerontol A Biol Sci Med Sci. 2011 Feb;66(2):191-201.
71	20974732		Rapamycin (14 mg/kg in food)	Rapamycin (via 14 mg/kg in food)	9	Pharmaceutical	Mouse	UM-HET3	None	Female	50	50	Median	891	1008	117	13%	<0.05	90th percentile	1061	1211	150	14%	<0.05	There were three test sites, but the authors apparently did not reported statistical data (days lived) for the *pooled* site data. Here, data was reported for the site with intermediate results (not the highest or lowest), which was the University of Michigan (UM). Furthermore, one might reasonably doubt the male and female 90th percentile lifespan data, which was reported as exactly the same for…	Rapamycin, but not resveratrol or simvastatin, extends life span of genetically heterogeneous mice	J Gerontol A Biol Sci Med Sci. 2011 Feb;66(2):191-201.
125	27549339		Rapamycin injection (8 mg/kg/day) for 3 months	Rapamycin injection (8 mg/kg/day) for 3 months	20	Pharmaceutical	Mouse	C57BL/6JNia	None	Male	20	20	Median	925	1054	129	14%	0.03	Not reported	Not reported	Not reported	Not reported	Not reported	Not reported	Median lifespan of males was extended by rapamycin both via injection and food, where median female lifespan was only extended via rapamycin in food.	Transient rapamycin treatment can increase lifespan and healthspan in middle-aged mice	Elife. 2016 Aug 23:5:e16351.
139	29654651		RGS14 knockout	RGS14 knockout	0	Genetic	Mouse	C57Bl6/J	RGS14 gene knockout	Pooled	41	30	Median	725	825	100	14%	<0.05	90th percentile	900	1050	150	17%	Not reported	The median and maximum lifespan data was estimated from the images reported by the authors because the number of days of lifespan appeared not to be reported in the text.	Enhanced longevity and metabolism by brown adipose tissue with disruption of the regulator of G protein signaling 14	Aging Cell. 2018 Aug;17(4):e12751.
57	19536287		RII-β (component of PKA) knockout	RII-β knockout	0	Genetic	Mouse	C57BL/6	RII-beta KO	Male	20	20	Median	884	1005	121	14%	0.006	80th percentile	941	1073	132	14%	0.004	There appeared to be a mild negative effect on female mouse lifespan, particularly in the first half of life (see Figure 1B).	Disruption of protein kinase A in mice enhances healthy aging	PLoS One. 2009 Jun 18;4(6):e5963.
178	34050173		SIRT6 overexpression	SIRT6 overexpression	0	Genetic	Mouse	C57BL/6J + BALB/cOlaHsd	SIRT6 transgenic overexpression	Male	52	51	Median	732	932	200	27%	0.0000071	Not reported	Not reported	Not reported	Not reported	11%	0.007	The maximum lifespan data was apparently not reported in the text nor in Figure 1A, though the percent of maximum lifespan extension and the p-values were reported in the text just before Figure 1A. There was also a lifespan extension associated with SIRT6 + SIRT1 overexpression but not with SIRT1 overexpression alone, suggesting SIRT6 was the cause of the lifespan extension in the SIRT6+SIRT1 ov…	Restoration of energy homeostasis by SIRT6 extends healthy lifespan	Nat Commun. 2021 May 28;12(1):3208.
179	34050173		SIRT6 overexpression	SIRT6 overexpression	0	Genetic	Mouse	C57BL/6J + BALB/cOlaHsd	SIRT6 transgenic overexpression	Female	50	41	Median	756	872	116	15%	0.0000011	Not reported	Not reported	Not reported	Not reported	15%	0.001	The maximum lifespan data was apparently not reported in the text nor in Figure 1A, though the percent of maximum lifespan extension and the p-values were reported in the text just before Figure 1A. There was also a lifespan extension associated with SIRT6 + SIRT1 overexpression but not with SIRT1 overexpression alone, suggesting SIRT6 was the cause of the lifespan extension in the SIRT6+SIRT1 ov…	Restoration of energy homeostasis by SIRT6 extends healthy lifespan	Nat Commun. 2021 May 28;12(1):3208.
210	36429037		SIRT7 knockout	SIRT7 knockout	0	Genetic	Mice	C57BL/6	SIRT7 KO	Male	50	42	Median	887	972	85	10%	0.0053	90th percentile	1053	1086	33	3%	<0.05	There appears to have been no statistically significant effect in female mice.	SIRT7 Deficiency Protects against Aging-Associated Glucose Intolerance and Extends Lifespan in Male Mice	Cells. 2022 Nov 15;11(22):3609.
52	19120018		SkQ1 (mitochondrial antioxidant 10-(6′-plastoquinonyl) decyltriphenylphosphonium) (5 nmol/kg/day)	SkQ1 (5 nmol/kg/day)	2	Pharmaceutical	Mouse	SHR or HER-2/neu	HER-2/neu	Female	25	25	Median	296	571	275	93%	see note	90th percentile	727	820	93	13%	see note	This study was almost rejected from our dataset because the control group had such a short median lifespan (~275 days), and the authors apparently didn't report a p-value for this lifespan enhancement effect. However, the authors mentioned the relevance of housing the mice in a non-sterile vivarium, which might explain the short median lifespan of the mice in this study. Still, the authors also u…	Mitochondria-targeted plastoquinone derivatives as tools to interrupt execution of the aging program. 5. SkQ1 prolongs lifespan and prevents development of traits of senescence	Biochemistry (Mosc). 2008 Dec;73(12):1329-42.
126	27841876		Spermidine (late-life)	Spermidine (late-life)	18	Dietary	Mouse	C57BL/6J	None	Pooled	91	87	Median	770	847	77	10%	0.012	Not reported	Not reported	Not reported	Not reported	Not reported	Not reported		Cardioprotection and lifespan extension by the natural polyamine spermidine	Nat Med. 2016 Dec;22(12):1428-1438.
127	27841876		Spermidine (lifelong)	Spermidine (lifelong)	4	Dietary	Mouse	C57BL/6J	None	Female	40	41	Median	801	899	98	12%	0.018	Not reported	Not reported	Not reported	Not reported	Not reported	Not reported		Cardioprotection and lifespan extension by the natural polyamine spermidine	Nat Med. 2016 Dec;22(12):1428-1438.
129	28386016		Spermidine (lifelong in drinking water at 3 mM)	Spermidine (lifelong)	0	Dietary	Mouse	C57BL/6J	None	Male	40	22	Median	807	999	192	24%	0.02	90th percentile	885	999	114	13%	Not reported	The maximum lifespan (90th percentile) was not reported but appeared significant. It also appears as though 60% of the intervention mice died in the same month, which looks conspicuous.	Spermidine Prolongs Lifespan and Prevents Liver Fibrosis and Hepatocellular Carcinoma by Activating MAP1S-Mediated Autophagy	Cancer Res. 2017 Jun 1;77(11):2938-2951.
128	27841876		Spermine (lifelong)	Spermine (lifelong)	4	Dietary	Mouse	C57BL/6J	None	Female	40	17	Median	801	913	112	14%	0.022	90th percentile	925	1070	145	16%	Not reported	The maximum lifespan benefit of lifelong spermine supplementation seems significant from the survival curve in Figure 1c, but it appears to not have been explicitly reported in the text.	Cardioprotection and lifespan extension by the natural polyamine spermidine	Nat Med. 2016 Dec;22(12):1428-1438.
11	4313391		Splenectomy	Splenectomy	22	Surgical	Mouse	BC3F1	None	Not reported	96	30	Median	812	1092	280	34%	Not reported	90th percentile	1050	1148	98	9%	Not reported	The extension of median lifespan illustrated in Figure 4 looks remarkable.	Presence of life-shortening factors in spleens of aged mice of long lifespan and extension of life expectancy by splenectomy	Exp Gerontol. 1969 Dec;4(4):267-76.
101	24582957		SRT1720 (SIRT1 activator, 100 mg/kg)	SRT1720 (SIRT1 activator, 100 mg/kg)	6.5	Pharmaceutical	Mouse	C57BL/6J	None	Male	100	100	Mean	Not reported	Not reported	Not reported	9%	0.04	No benefit	No benefit	No benefit	No benefit	No benefit	No benefit	This result seems to only be relevant in the context of a high-fat diet (the high-fat diet group had a greater increase in lifespan). Here, the autohrs reported only a 9% mean lifespan extension, no extension in median or maximum lifespan, with a p-value of 0.04, and only in males.	The SIRT1 activator SRT1720 extends lifespan and improves health of mice fed a standard diet	Cell Rep. 2014 Mar 13;6(5):836-43.
112	26331606		Syntaxin 4 overexpression	Syntaxin 4 overexpression	0	Genetic	Mouse	C57BL/6J	Syntaxin 4 overexpression	Male	12	11	Median	795	1000	205	26%	<0.002	80th percentile	850	1200	350	41%	<0.002	The positive effects on median and maximum lifespan in males seem remarkably high. The relevant data was estimated from the survival curve in Figures 1B and 1C because the authors apparently did not report that data in the text.	Syntaxin 4 Overexpression Ameliorates Effects of Aging and High-Fat Diet on Glucose Control and Extends Lifespan	Cell Metab. 2015 Sep 1;22(3):499-507.
113	26331606		Syntaxin 4 overexpression	Syntaxin 4 overexpression	0	Genetic	Mouse	C57BL/6J	Syntaxin 4 overexpression	Female	7	6	Median	810	950	140	17%	<0.02	Not reported	Not reported	Not reported	Not reported	Not reported	Not reported	The effect on maximum lifespan in females is questionable, given how small the sample size was and there being no p-value reported for this effect, so it was not reported here.	Syntaxin 4 Overexpression Ameliorates Effects of Aging and High-Fat Diet on Glucose Control and Extends Lifespan	Cell Metab. 2015 Sep 1;22(3):499-507.
196	35537048		TERT gene therapy	TERT gene therapy	18	Gene Therapy	Mouse	C57BL/6J	None	Female	9	8	Median	795	1125	330	42%	<0.001	Last mouse	870	1236	366	42%	Not reported		New intranasal and injectable gene therapy for healthy life extension	Proc Natl Acad Sci U S A. 2022 May 17;119(20):e2121499119.
81	22585399		TERT gene therapy at age 1 year (AAV9 mTERT)	TERT gene therapy at age 1 year	12	Gene Therapy	Mouse	C57BL/6	None	Pooled	12	21	Median	756	938	182	24%	<0.05	Longest-lived	966	1091	125	13%	0.05		Telomerase gene therapy in adult and old mice delays aging and increases longevity without increasing cancer	EMBO Mol Med. 2012 Aug;4(8):691-704.
82	22585399		TERT gene therapy at age 2 years (AAV9 mTERT)	TERT gene therapy at age 2 years	24	Gene Therapy	Mouse	C57BL/6	None	Pooled	14	23	Median	840	945	105	13%	<0.05	90th percentile	1050	1148	98	9%	0.05		Telomerase gene therapy in adult and old mice delays aging and increases longevity without increasing cancer	EMBO Mol Med. 2012 Aug;4(8):691-704.
51	19013273		TERT overexpression, constitutive, transgenic, in cancer-resistant mice (extra p53, p16, and p19ARF)	TERT overexpression	0	Genetic	Mice	75% C57LB6, 25% DBA	see note	Pooled	39	27	Median	882	1092	210	24%	0.05	90th percentile	1064	1141	77	7%	Not reported	Here is what the authors reported about the many genetic modification used: "Mice that constitutively express the telomerase Tert gene in the stem and proliferative compartments of a wide range of epithelial tissues (K5-Tert mice, Gonza´ lez-Sua´rez et al., 2001, 2002; referred hereafter as TgTert), were crossed with cancer-resistant Sp53 and Sp16/SArf mice (Garcia-Cao et al., 2002; Matheu et al.…	Telomerase reverse transcriptase delays aging in cancer-resistant mice	Cell. 2008 Nov 14;135(4):609-22.
37	17115892		Thioproline (2 g/kg food)	Thioproline (2 g/kg food)	6.5	Pharmaceutical	Mouse	CD1/UCadiz (short-lived	Unknown	Male	50	70	Median	434	560	126	29%	<0.001	Not reported	826	1015	189	23%	<0.001		Dietary thioproline decreases spontaneous food intake and increases survival and neurological function in mice	Antioxid Redox Signal. 2007 Jan;9(1):131-41.
38	17115892		Thioproline (2 g/kg food)	Thioproline (2 g/kg food)	6.5	Pharmaceutical	Mouse	CD1/UCadiz (short-lived	Unknown	Female	40	50	Median	574	693	119	21%	<0.01	Not reported	1029	1134	105	10%	<0.01		Dietary thioproline decreases spontaneous food intake and increases survival and neurological function in mice	Antioxid Redox Signal. 2007 Jan;9(1):131-41.
130	28400571		Tuberous sclerosis complex 1/2 overexpression	Tuberous sclerosis complex 1/2 overexpression	0	Genetic	Mouse	Not reported	Constitutive Tsc1/2 overexpression	Female	27	40	Median	795	893	98	12%	0.028	Not reported	Not reported	Not reported	Not reported	Not reported	Not reported	No lifespan benefit was observed in male mice.	Moderate lifelong overexpression of tuberous sclerosis complex 1 (TSC1) improves health and survival in mice	Sci Rep. 2017 Apr 11;7(1):834.
20	9060969	https://academic.oup.com/biomedgerontology/article-pdf/52A/2/B118/1836263/52A-2-B118.pdf	Urokinase-type plasmalogen activator (uPA) overexpression	Urokinase-type plasmalogen activator overexpression	0	Genetic	Mouse	FVB/N	uPA overexpression	Female	33	33	Median	840	990	150	18%	0.0001	90th percentile	900	1080	180	20%	Not reported	The number of days for median and maximum lifespan were not reported explicitly in the text. So, they were estimated them from the survival curve in Figure 5 and reported here.	Transgenic mice overexpressing urokinase-type plasminogen activator in the brain exhibit reduced food consumption, body weight and size, and increased longevity	J Gerontol A Biol Sci Med Sci. 1997 Mar;52(2):B118-24.
180	34326210		VEGF overexpression	VEGF overexpression	0	Gene Therapy	Mouse	C57BL/6J + BALB/cOlaHsd	VEGF overexpression in liver and secreted to circulation	Male	50	50	Median	720	1080	360	50%	<0.0001	90th percentile	780	1125	345	44%	Not reported	The methods data appears to be be behind a paywall. The median and maximum lifespan data (in days) was not reported in the text. So, they were estimated from Figure 2A, and the estimates were reported here.	Counteracting age-related VEGF signaling insufficiency promotes healthy aging and extends life span	Science. 2021 Jul 30;373(6554):eabc8479.
181	34326210		VEGF overexpression	VEGF overexpression	0	Gene Therapy	Mouse	C57BL/6J + BALB/cOlaHsd	VEGF overexpression in liver and secreted to circulation	Female	50	50	Median	720	990	270	38%	<0.0001	90th percentile	750	1050	300	40%	Not reported	The methods data appears to be be behind a paywall. The median and maximum lifespan data (in days) was not reported in the text. So, they were estimated from Figure 2A, and the estimates were reported here.	Counteracting age-related VEGF signaling insufficiency promotes healthy aging and extends life span	Science. 2021 Jul 30;373(6554):eabc8479.
159	32012439		Young HSC transplantation	Young HSC transplantation	19	Cellular	Mouse	C57BL/6NIA	None	Female	43	35	Median	835	938	103	12%	<0.0001	90th percentile	978	1067	89	9%	<0.0001	The intervention was somewhat complicated: they used cycles of G-CSF to mobilize HSC in the *old* animals to "create a space" in the bone marrow for the donor HSC to engraft, which they then transplanted.	Mobilization-based transplantation of young-donor hematopoietic stem cells extends lifespan in mice	Aging Cell. 2020 Mar;19(3):e13110.
78	22355586		Young MSC transplantation after bone marrow destruction with gamma irradiation	Young MSC transplantation after gamma irradiation	22	Cellular	Mouse	C57BL/6	None	Female	10	14	Mean	765	890	125	16%	0.009	90th percentile	865	975	110	13%	Not reported	There appears to be a benefit to maximum lifespan as well as mean and median, but the authors apparently did not report it in the text. That data was estimated from the survival curve in Figure 4a and reported here. Also, note that the intervention was preceded by x-ray irradiation to destroy endogenous bone marrow--something we probably won't lightly consider for living humans.	Transplantation of mesenchymal stem cells from young donors delays aging in mice	Sci Rep. 2011:1:67.
60	19776215		Young ovary transplant after menopause	Young ovary transplant after menopause	11	Surgical	Mouse	CBA/J	None	Female	Not reported	Not reported	Mean	722	810	88	12%	<0.05	90th percentile	790	870	80	10%	Not reported	There appears to have been a benefit on median and maximum lifespan but the latter was not reported in the text. So, it was estimated from the survival curve in Figure 4.	Transplantation of young ovaries to old mice increased life span in transplant recipients	J Gerontol A Biol Sci Med Sci. 2009 Dec;64(12):1207-11.
74	21791575		α-1A adrenergic receptor stimulation (long-term)	α-1A adrenergic receptor stimulation	0	Genetic	Mouse	C57BL/6	Receptor overexpression	Male	Not reported	Not reported	Median	760	822	62	8%	<0.01	Not reported	Not reported	Not reported	Not reported	Not reported	Not reported		Long-term α1A-adrenergic receptor stimulation improves synaptic plasticity, cognitive function, mood, and longevity	Mol Pharmacol. 2011 Oct;80(4):747-58.
75	21791575		α-1A adrenergic receptor stimulation (long-term)	α-1A adrenergic receptor stimulation	0	Genetic	Mouse	C57BL/6	Receptor overexpression	Pooled	54	32	Median	724	806	82	11%	<0.01	90th percentile	909	982	73	8%	Not reported		Long-term α1A-adrenergic receptor stimulation improves synaptic plasticity, cognitive function, mood, and longevity	Mol Pharmacol. 2011 Oct;80(4):747-58.
166	32877690		α-ketoglutarate	α-ketoglutarate	18	Pharmaceutical	Mouse	C57BL/6 mice	None	Female	23	23	Median	847	875	28	3%	0.03	90th percentile	931	962	31	3%	Not reported		Alpha-Ketoglutarate, an Endogenous Metabolite, Extends Lifespan and Compresses Morbidity in Aging Mice	Cell Metab. 2020 Sep 1;32(3):447-456.e6.
1	689120		β-aminopropionitrile (1 mg/mL in drinking water for 12 months)	β-aminopropionitrile	2	Pharmaceutical	Mouse	LAF/J	None	Male	24	24	Mean	984	1041	57	6%	<0.05	Not significant	Not significant	Not significant	Not significant	Not significant	Not significant		Beta-aminopropiontrile promotes longevity in mice	Exp Gerontol. 1978;13(3-4):251-4.
2	689120		β-aminopropionitrile (1 mg/mL in drinking water for 18 months)	β-aminopropionitrile	2	Pharmaceutical	Mouse	LAF/J	None	Male	24	24	Mean	984	1041	57	6%	<0.05	Not significant	Not significant	Not significant	Not significant	Not significant	Not significant		Beta-aminopropiontrile promotes longevity in mice	Exp Gerontol. 1978;13(3-4):251-4.
3	689120		β-aminopropionitrile (1 mg/mL in drinking water for 6 months)	β-aminopropionitrile	2	Pharmaceutical	Mouse	LAF/J	None	Male	24	24	Mean	984	1029	45	5%	<0.05	Not significant	Not significant	Not significant	Not significant	Not significant	Not significant		Beta-aminopropiontrile promotes longevity in mice	Exp Gerontol. 1978;13(3-4):251-4.
4	689120		β-aminopropionitrile (3 mg/mL in drinking water for 12 months)	β-aminopropionitrile	2	Pharmaceutical	Mouse	LAF/J	None	Male	24	24	Mean	984	1029	45	5%	<0.05	Not significant	Not significant	Not significant	Not significant	Not significant	Not significant		Beta-aminopropiontrile promotes longevity in mice	Exp Gerontol. 1978;13(3-4):251-4.
5	689120		β-aminopropionitrile (3 mg/mL in drinking water for 18 months)	β-aminopropionitrile	2	Pharmaceutical	Mouse	LAF/J	None	Male	24	24	Mean	984	1038	54	5%	<0.05	Not significant	Not significant	Not significant	Not significant	Not significant	Not significant		Beta-aminopropiontrile promotes longevity in mice	Exp Gerontol. 1978;13(3-4):251-4.
215	38753230		Canagliflozin (180 ppm in food)	Canagliflozin (180 ppm in food)	16	Pharmaceutical	Mouse	UM-HET3	None	Male	302	102	Median	826	940	114	14%	0.004	90th percentile	1106	1153	47	4%	0.04	There was a 6.1% negative effect reported for female mice.	Lifespan effects in male UM-HET3 mice treated with sodium thiosulfate, 16-hydroxyestriol, and late-start canagliflozin.	Geroscience. 2024 May 16. doi: 10.1007/s11357-024-01176-2. Online ahead of print.
216	38753230		Canagliflozin (180 ppm in food)	Canagliflozin (180 ppm in food)	6	Pharmaceutical	Mouse	UM-HET3	None	Male	302	60	Median	826	899	73	9%	0.02	Not significant	Not significant	Not significant	Not significant	Not significant	Not significant	The authors reported that due to a technical error, this group of mice (at TJL only) was meant to receive canagliflozin at 16 months of age but was instead administered the drug at 6 months of age.	Lifespan effects in male UM-HET3 mice treated with sodium thiosulfate, 16-hydroxyestriol, and late-start canagliflozin.	Geroscience. 2024 May 16. doi: 10.1007/s11357-024-01176-2. Online ahead of print.
217	38753230		Canagliflozin (180 ppm in food)	Canagliflozin (180 ppm in food)	16	Pharmaceutical	Mouse	UM-HET3	None	Female	272	92	Median	906	851	-55	6%	0.03	Not significant	Not significant	Not significant	Not significant	Not significant	Not significant	The authors indeed reported a negative effect on median lifespan in females, but no statistically significant effect on maximum lifespan in females.	Lifespan effects in male UM-HET3 mice treated with sodium thiosulfate, 16-hydroxyestriol, and late-start canagliflozin.	Geroscience. 2024 May 16. doi: 10.1007/s11357-024-01176-2. Online ahead of print.
218	38753230		16α-hydroxyestriol (OH_Est at 5 ppm)	16α-hydroxyestriol (OH_Est at 5 ppm)	12	Pharmaceutical	Mouse	UM-HET3	None	Male	302	156	Median	826	951	125	15%	0.0001	90th percentile	1106	1157	51	5%	0.03		Lifespan effects in male UM-HET3 mice treated with sodium thiosulfate, 16-hydroxyestriol, and late-start canagliflozin.	Geroscience. 2024 May 16. doi: 10.1007/s11357-024-01176-2. Online ahead of print.

## Sheet: Supplementary SOLID Table Templ
Statistical Overview of Lifespan Intervention Data (SOLID) Table
Species:			Mouse
Strain:			UM-HET3
Genetic modifications:			None
Intervention:			Rapamycin at 14 mg/kg in food
Initiated at:			9 months
		Lifespan at x% survival (in days)
		0.9		0.5		0.1
		Females	Males	Females	Males	Females	Males
na	Control	264	331	249	314	237	309
	Treated	142	161	130	145	130	145
Lifespan (days)	Control	664	503	891	831	1078	1061
	Treated	776	543	1039	890	1254	1183
Difference (days)b		112	40	148	59	176	122
Difference (%)c		0.168675	0.0795229	0.166105	0.0709988	0.163265	0.114986
p-valued		0.0109	0.0565	<0.0001	0.0894	<0.0001	<0.0001
a. Represents the number in each group "at risk" (after censoring) up to that point in time.
b. Calculated as (treated lifespan - control lifespan) at each survival point.
c. Calculated as ((treated lifespan - control lifespan) / control lifespan) at each
survival point.
d. p-value was calculated using a one-tailed Fisher's exact test with 2x2 contingency tables
(alive, dead, controls, and treated) for the proportion of the treated group alive at
the given survival point for the control group (in days), e.g., for female controls at
90% survival, lifespan was 664 days, while at 664 days, 96.5% (a higher proportion)
in the treated group were surviving in this investigation.
